# Supplementary material for: Alpha- and beta- adrenergic receptors regulate inflammatory responses to acute and chronic sleep fragmentation in mice
Source: PeerJ. 2021 Jun 24;9:e11616. doi: 10.7717/peerj.11616 (PMC8236227; doi:10.7717/peerj.11616)
Supplement: Supplemental Information 1 — Each data point indicates the mRNA expression level of the target gene. [file peerj-09-11616-s001.xlsx]

## Sheet: ASF_IL1B_Fat
Sample Name	Treatment	Relative Expression	CONVeh Average	Fold Change	TTEST	TTEST
F54	CONVeh	6.93e-06	1.0598e-05	0.653897	0.031444	0.031444
F55	CONVeh	1.61e-05		1.51915
F56	CONVeh	6.88e-06		0.649179
F57	CONVeh	3.27e-06		0.308549
F58	CONVeh	7.05e-06		0.66522
F59	CONVeh	1.11e-05		1.04737
F60	CONVeh	7.46e-06		0.703906
F61	CONVeh	2.26e-05		2.13248
F62	CONVeh	1.71e-05		1.61351
F63	CONVeh	7.49e-06		0.706737
F74	CONPhe	1.37e-05		1.2927
F76	CONPhe	4.96e-06		0.468013
F77	CONPhe	6.2e-06		0.585016
F78	CONPhe	2.41e-06		0.227401
F79	CONPhe	3.21e-06		0.302887
F80	CONPhe	3.01e-06		0.284016
F81	CONPhe	2.48e-06		0.234006
F82	CONPhe	1.06e-06		0.100019
F83	CONPhe	1.93e-06		0.18211
F64	CONPro	1.47e-05		1.38705
F65	CONPro	7.83e-06		0.738819
F66	CONPro	9.21e-06		0.869032
F67	CONPro	2.69e-05		2.53821
F68	CONPro	7.23e-05		6.82204
F71	CONPro	8.3e-06		0.783167
F72	CONPro	1.21e-05		1.14172
F73	CONPro	2.33e-05		2.19853
F02	SFVeh	5.86e-05		5.52935
F03	SFVeh	0.000227756		21.4905
F04	SFVeh	0.000108329		10.2216
F42	SFVeh	0.000191101		18.0318
F43	SFVeh	7.19e-05		6.7843
F44	SFVeh	0.000160632		15.1568
F45	SFVeh	0.00102577		96.789
F26	SFPhe	0.000640399		60.4264
F27	SFPhe	0.000139208		13.1353
F28	SFPhe	7.76e-05		7.32214
F29	SFPhe	0.000160816		15.1742
F30	SFPhe	0.000334393		31.5525
F53	SFPhe	5.43e-05		5.12361
F21	SFPro	3.31e-05		3.12323
F22	SFPro	0.000238034		22.4603
F23	SFPro	0.000594812		56.1249
F24	SFPro	0.000158365		14.9429
F25	SFPro	5.32e-05		5.01982
F46	SFPro	0.000591528		55.8151
F47	SFPro	0.000150727		14.2222
F48	SFPro	0.000191166		18.0379
F49	SFPro	0.000296489		27.9759

## Sheet: ASF_IL1B_Heart
Sample Name	Treatment	Relative Expression	CONVeh Average	Fold Change
H54	CONVeh	2.7178e-05	3.9087e-05	0.69532
H55	CONVeh	2.9892e-05		0.764755
H56	CONVeh	2.48737e-05		0.636367
H57	CONVeh	2.47146e-05		0.632297
H58	CONVeh	2.28317e-05		0.584125
H59	CONVeh	1.34891e-05		0.345104
H60	CONVeh	8.42284e-05		2.15489
H61	CONVeh	8.54888e-05		2.18714
H74	CONPhe	3.42545e-05		0.876365
H75	CONPhe	2.74138e-05		0.701353
H76	CONPhe	4.20938e-05		1.07692
H78	CONPhe	3.22172e-05		0.824243
H80	CONPhe	4.11316e-05		1.05231
H83	CONPhe	8.40701e-05		2.15084
H64	CONPro	2.61536e-05		0.669112
H65	CONPro	2.77471e-05		0.70988
H67	CONPro	1.59146e-05		0.407158
H68	CONPro	6.31463e-05		1.61553
H70	CONPro	2.33546e-05		0.597502
H71	CONPro	2.27148e-05		0.581134
H72	CONPro	7.22083e-06		0.184737
H73	CONPro	1.81299e-05		0.463834
H01	SFVeh	6.0723e-05		1.55353
H02	SFVeh	0.000108388		2.77299
H03	SFVeh	0.000423972		10.8469
H04	SFVeh	0.0001366		3.49476
H05	SFVeh	0.000392852		10.0507
H42	SFVeh	7.15035e-05		1.82934
H44	SFVeh	1.72824e-05		0.442152
H45	SFVeh	5.20748e-05		1.33228
H28	SFPhe	0.00011618		2.97234
H29	SFPhe	9.52634e-05		2.43721
H30	SFPhe	9.87645e-05		2.52678
H50	SFPhe	7.88296e-05		2.01677
H51	SFPhe	6.41725e-05		1.64178
H52	SFPhe	9.36288e-06		0.239539
H53	SFPhe	1.61804e-05		0.413958
H22	SFPro	2.59105e-05		0.662892
H23	SFPro	3.11606e-05		0.797211
H24	SFPro	3.26416e-05		0.8351
H46	SFPro	3.94393e-05		1.00901
H47	SFPro	2.6495e-05		0.677846
H48	SFPro	6.3896e-06		0.163471
H49	SFPro	1.68966e-05		0.432281

## Sheet: ASF_IL1B_Liver
Sample Name	Treatment	Relative Expression	CONVeh Average	Fold Change
L54	CONVeh	1.33464e-05	2.66524e-05	0.500758
L55	CONVeh	4.08448e-05		1.5325
L56	CONVeh	3.56671e-05		1.33823
L57	CONVeh	1.36119e-05		0.510719
L58	CONVeh	1.87507e-05		0.703528
L59	CONVeh	2.41731e-05		0.906976
L60	CONVeh	2.54024e-05		0.9531
L62	CONVeh	4.1028e-05		1.53937
L63	CONVeh	2.70472e-05		1.01481
L74	CONPhe	1.4197e-05		0.532672
L75	CONPhe	1.5159e-05		0.568767
L76	CONPhe	1.04605e-05		0.392479
L77	CONPhe	2.39897e-05		0.900095
L78	CONPhe	1.34366e-05		0.504142
L79	CONPhe	4.04976e-05		1.51947
L80	CONPhe	3.40494e-05		1.27754
L81	CONPhe	3.56857e-05		1.33893
L82	CONPhe	3.24482e-05		1.21746
L83	CONPhe	2.58417e-05		0.969582
L64	CONPro	1.72321e-05		0.64655
L65	CONPro	2.00388e-05		0.751857
L66	CONPro	2.48715e-05		0.933181
L67	CONPro	1.84808e-05		0.693401
L68	CONPro	2.38235e-05		0.893859
L69	CONPro	4.20524e-05		1.57781
L70	CONPro	3.78165e-05		1.41888
L71	CONPro	2.3237e-05		0.871854
L72	CONPro	5.65384e-05		2.12132
L73	CONPro	5.13284e-05		1.92585
L01	SFVeh	0.0127268		477.511
L02	SFVeh	0.00287237		107.772
L04	SFVeh	3.76259e-05		1.41173
L05	SFVeh	0.000347349		13.0326
L42	SFVeh	0.000405083		15.1987
L44	SFVeh	0.00127066		47.6752
L45	SFVeh	0.00306977		115.178
L26	SFPhe	0.00547771		205.524
L27	SFPhe	0.00148588		55.7504
L28	SFPhe	0.00228566		85.758
L29	SFPhe	0.000287186		10.7752
L30	SFPhe	0.000705405		26.4668
L50	SFPhe	0.00117148		43.9539
L51	SFPhe	0.000412844		15.4899
L52	SFPhe	0.000734393		27.5545
L53	SFPhe	0.00205382		77.0596
L21	SFPro	0.00055361		20.7715
L22	SFPro	0.000233563		8.7633
L23	SFPro	0.00145989		54.7751
L46	SFPro	0.00288872		108.385
L47	SFPro	0.000977821		36.6879
L48	SFPro	0.000648031		24.3142
L49	SFPro	0.000525873		19.7308

## Sheet: ASF_IL1B_Spleen
Sample Name	Treatment	Relative Expression	CONVeh Average	Fold Change
S54	CONVeh	0.000554194	0.0298844	0.0185446
S55	CONVeh	0.00496996		0.166306
S56	CONVeh	0.00140076		0.0468726
S57	CONVeh	0.0208106		0.696369
S58	CONVeh	0.00467598		0.156469
S59	CONVeh	0.168207		5.62857
S62	CONVeh	0.01783		0.596631
S63	CONVeh	0.0206274		0.690239
S74	CONPhe	0.0111964		0.374657
S75	CONPhe	0.00383167		0.128216
S76	CONPhe	0.028808		0.96398
S77	CONPhe	0.0288671		0.965956
S79	CONPhe	0.0625864		2.09428
S80	CONPhe	0.0774916		2.59304
S81	CONPhe	0.0658132		2.20226
S82	CONPhe	0.0734541		2.45794
S83	CONPhe	0.0069069		0.23112
S64	CONPro	0.0409348		1.36977
S65	CONPro	0.00267221		0.089418
S66	CONPro	0.00508095		0.17002
S67	CONPro	0.00161674		0.0540996
S68	CONPro	0.0247935		0.829647
S69	CONPro	0.0059049		0.197591
S70	CONPro	0.00232422		0.0777734
S72	CONPro	0.0134095		0.448711
S73	CONPro	0.0107398		0.359377
S01	SFVeh	0.267109		8.93807
S02	SFVeh	0.0880861		2.94756
S03	SFVeh	0.0267		0.893442
S04	SFVeh	0.0674369		2.25659
S05	SFVeh	0.230868		7.72537
S44	SFVeh	0.65625		21.9596
S45	SFVeh	0.569449		19.055
S26	SFPhe	0.11102		3.71499
S27	SFPhe	0.156729		5.24451
S28	SFPhe	0.164025		5.48863
S29	SFPhe	0.134314		4.49446
S30	SFPhe	0.590711		19.7665
S50	SFPhe	0.602285		20.1538
S52	SFPhe	0.483449		16.1773
S53	SFPhe	0.181905		6.08693
S21	SFPro	0.0272335		0.911293
S22	SFPro	0.223404		7.4756
S23	SFPro	0.0297321		0.994902
S24	SFPro	0.168248		5.62997
S25	SFPro	0.102558		3.43182
S46	SFPro	0.351587		11.7649
S47	SFPro	0.0847284		2.8352
S48	SFPro	0.130076		4.35263
S49	SFPro	0.437195		14.6295

## Sheet: ASF_IL1B_PrefrontalCortex
Sample Name	Treatment	Relative Expression	CONVeh Average	Fold Change
FC54	CONVeh	9.41844e-05	0.000120655	0.780607
FC55	CONVeh	6.1152e-05		0.506832
FC56	CONVeh	0.000123355		1.02238
FC57	CONVeh	6.31374e-05		0.523287
FC58	CONVeh	0.000137705		1.14131
FC59	CONVeh	3.44402e-05		0.285443
FC60	CONVeh	6.9581e-05		0.576692
FC62	CONVeh	0.00029146		2.41564
FC63	CONVeh	0.000210883		1.74781
FC74	CONPhe	9.88299e-05		0.819109
FC76	CONPhe	3.87922e-05		0.321513
FC77	CONPhe	9.42876e-05		0.781462
FC78	CONPhe	0.000117829		0.976575
FC79	CONPhe	9.03479e-05		0.74881
FC80	CONPhe	5.44879e-05		0.4516
FC82	CONPhe	0.000174367		1.44517
FC83	CONPhe	3.28907e-05		0.2726
FC64	CONPro	5.67247e-05		0.470138
FC65	CONPro	6.3177e-05		0.523615
FC66	CONPro	7.3474e-05		0.608958
FC67	CONPro	0.000190587		1.5796
FC68	CONPro	5.55282e-05		0.460222
FC69	CONPro	0.000192125		1.59235
FC70	CONPro	0.000135815		1.12564
FC71	CONPro	6.70851e-05		0.556006
FC72	CONPro	3.49527e-05		0.28969
FC73	CONPro	2.34872e-05		0.194664
FC01	SFVeh	0.000875799		7.25868
FC02	SFVeh	0.000394118		3.26648
FC03	SFVeh	0.000556741		4.61431
FC04	SFVeh	0.000879529		7.2896
FC05	SFVeh	0.00117093		9.70473
FC42	SFVeh	0.0016848		13.9638
FC43	SFVeh	0.00412173		34.1612
FC44	SFVeh	0.00308273		25.5499
FC45	SFVeh	0.00385198		31.9255
FC26	SFPhe	0.000789878		6.54657
FC27	SFPhe	0.00076646		6.35248
FC28	SFPhe	0.000167011		1.3842
FC29	SFPhe	0.000467982		3.87867
FC30	SFPhe	0.000480185		3.97981
FC50	SFPhe	0.00182249		15.105
FC51	SFPhe	0.00170609		14.1402
FC52	SFPhe	0.00164794		13.6582
FC53	SFPhe	0.000732903		6.07435
FC21	SFPro	0.00109198		9.05037
FC23	SFPro	0.000721024		5.9759
FC24	SFPro	0.000974164		8.07394
FC25	SFPro	0.00091474		7.58143
FC47	SFPro	0.000878143		7.27811
FC48	SFPro	0.00115363		9.56138
FC49	SFPro	0.00130493		10.8154

## Sheet: ASF_IL1B_Hippocampus
Sample Name	Treatment	Relative Expression	CONVeh Average	Fold Change
Hip54	CONVeh	1.27e-06	8.826e-07	1.43893
Hip55	CONVeh	1.14e-06		1.29164
Hip56	CONVeh	1.76e-07		0.199411
Hip57	CONVeh	3.24e-07		0.367097
Hip58	CONVeh	2.98e-07		0.337639
Hip59	CONVeh	9.81e-07		1.11149
Hip60	CONVeh	1.05e-06		1.18967
Hip61	CONVeh	9.53e-07		1.07976
Hip62	CONVeh	2.53e-06		2.86653
Hip63	CONVeh	1.04e-07		0.117834
Hip74	CONPhe	1.19e-06		1.34829
Hip75	CONPhe	3.69e-06		4.18083
Hip76	CONPhe	2.96e-06		3.35373
Hip78	CONPhe	1.54e-06		1.74484
Hip79	CONPhe	1.28e-06		1.45026
Hip80	CONPhe	4.09e-06		4.63404
Hip81	CONPhe	3.93e-06		4.45275
Hip83	CONPhe	2.05e-06		2.32268
Hip64	CONPro	7.58e-07		0.858826
Hip65	CONPro	1.14e-06		1.29164
Hip66	CONPro	9.51e-07		1.0775
Hip67	CONPro	1.06e-06		1.201
Hip68	CONPro	7.8e-07		0.883753
Hip69	CONPro	7.96e-06		9.01881
Hip70	CONPro	5.51e-06		6.24292
Hip71	CONPro	1.48e-07		0.167686
Hip72	CONPro	9.75e-07		1.10469
Hip73	CONPro	4.2e-06		4.75867
Hip01	SFVeh	7.41e-06		8.39565
Hip02	SFVeh	1.55e-05		17.5617
Hip04	SFVeh	1.68e-05		19.0347
Hip05	SFVeh	3.55e-05		40.2221
Hip42	SFVeh	4.1e-06		4.64537
Hip43	SFVeh	7.39e-06		8.37299
Hip45	SFVeh	3.38e-06		3.82959
Hip26	SFPhe	7.25e-06		8.21437
Hip27	SFPhe	7.42e-06		8.40698
Hip29	SFPhe	7.15e-06		8.10107
Hip30	SFPhe	3.38e-06		3.82959
Hip50	SFPhe	3.31e-06		3.75028
Hip51	SFPhe	6.25e-06		7.08135
Hip52	SFPhe	4.84e-06		5.4838
Hip53	SFPhe	2.29e-06		2.59461
Hip21	SFPro	2.15e-05		24.3598
Hip22	SFPro	4.74e-05		53.705
Hip23	SFPro	3.4e-06		3.85225
Hip24	SFPro	2.21e-05		25.0397
Hip25	SFPro	1.86e-05		21.0741
Hip46	SFPro	3.98e-06		4.5094
Hip48	SFPro	3.49e-06		3.95423
Hip49	SFPro	9.43e-06		10.6843

## Sheet: ASF_IL1B_Hypothalamus
Sample Name	Treatment	Relative Expression	CONVeh Average	Fold Change
Hyp54	CONVeh	4.29922e-05	3.06364e-05	1.4033
Hyp55	CONVeh	4.00114e-05		1.30601
Hyp56	CONVeh	4.0606e-05		1.32542
Hyp57	CONVeh	3.0643e-05		1.00021
Hyp58	CONVeh	1.88443e-05		0.615095
Hyp59	CONVeh	1.94159e-05		0.633752
Hyp60	CONVeh	4.98812e-05		1.62817
Hyp61	CONVeh	4.06311e-05		1.32624
Hyp62	CONVeh	1.37928e-05		0.450209
Hyp63	CONVeh	9.54634e-06		0.311601
Hyp74	CONPhe	8.82937e-07		0.0288198
Hyp76	CONPhe	9.63391e-07		0.0314459
Hyp77	CONPhe	1.30988e-06		0.0427556
Hyp78	CONPhe	1.0234e-06		0.0334047
Hyp79	CONPhe	2.84893e-06		0.0929916
Hyp81	CONPhe	2.13201e-06		0.0695907
Hyp82	CONPhe	3.6275e-06		0.118405
Hyp83	CONPhe	6.75086e-07		0.0220354
Hyp64	CONPro	5.41939e-06		0.176894
Hyp65	CONPro	3.28004e-06		0.107063
Hyp66	CONPro	1.12885e-05		0.368467
Hyp67	CONPro	1.16748e-06		0.0381076
Hyp68	CONPro	5.78573e-06		0.188851
Hyp69	CONPro	2.654e-06		0.0866289
Hyp70	CONPro	3.8932e-06		0.127077
Hyp71	CONPro	2.89191e-06		0.0943945
Hyp72	CONPro	3.6401e-06		0.118816
Hyp73	CONPro	2.59688e-06		0.0847645
Hyp01	SFVeh	9.4135e-05		3.07265
Hyp02	SFVeh	0.000220258		7.18942
Hyp03	SFVeh	0.000244962		7.99578
Hyp04	SFVeh	0.000141734		4.62632
Hyp05	SFVeh	0.000398392		13.0039
Hyp42	SFVeh	0.00045883		14.9766
Hyp43	SFVeh	0.000489393		15.9742
Hyp26	SFPhe	0.000347184		11.3324
Hyp27	SFPhe	0.000324413		10.5891
Hyp28	SFPhe	0.000256387		8.3687
Hyp29	SFPhe	3.4338e-05		1.12082
Hyp30	SFPhe	5.01473e-05		1.63685
Hyp50	SFPhe	0.000219253		7.15661
Hyp51	SFPhe	0.000174773		5.70475
Hyp52	SFPhe	6.51659e-05		2.12707
Hyp53	SFPhe	9.80408e-05		3.20014
Hyp21	SFPro	7.33228e-05		2.39332
Hyp22	SFPro	0.000175704		5.73513
Hyp23	SFPro	0.000510798		16.6729
Hyp24	SFPro	0.000268915		8.77762
Hyp25	SFPro	0.000636698		20.7824
Hyp46	SFPro	0.000143443		4.68211
Hyp47	SFPro	0.000144045		4.70176
Hyp48	SFPro	2.83554e-05		0.925545
Hyp49	SFPro	2.62397e-05		0.856487
