# Supplementary material for: Alpha- and beta- adrenergic receptors regulate inflammatory responses to acute and chronic sleep fragmentation in mice
Source: PeerJ. 2021 Jun 24;9:e11616. doi: 10.7717/peerj.11616 (PMC8236227; doi:10.7717/peerj.11616)
Supplement: Supplemental Information 2 — Each data point indicates the mRNA expression level of the target gene. [file peerj-09-11616-s002.xlsx]

## Sheet: ASF_TNFa_Fat
Sample Name	Treatment	Relative Expression	CONVeh Average	Fold Change
F54	CONVeh	0.0149126	0.0197767	0.754049
F55	CONVeh	0.0242676		1.22708
F56	CONVeh	0.0122737		0.620612
F57	CONVeh	0.00637992		0.322597
F58	CONVeh	0.0114823		0.580597
F59	CONVeh	0.0312094		1.57809
F60	CONVeh	0.043076		2.17812
F61	CONVeh	0.0252858		1.27856
F62	CONVeh	0.0152939		0.773329
F63	CONVeh	0.013586		0.68697
F74	CONPhe	0.0211313		1.06849
F75	CONPhe	0.0350978		1.7747
F76	CONPhe	0.0252214		1.27531
F77	CONPhe	0.00823125		0.416209
F78	CONPhe	0.00643911		0.32559
F80	CONPhe	0.0152679		0.772013
F82	CONPhe	0.00782034		0.395432
F83	CONPhe	0.00498227		0.251926
F64	CONPro	0.0216436		1.0944
F65	CONPro	0.0145529		0.73586
F66	CONPro	0.0139332		0.704525
F67	CONPro	0.0360239		1.82153
F68	CONPro	0.0471419		2.3837
F71	CONPro	0.0162731		0.822841
F72	CONPro	0.0592389		2.99538
F73	CONPro	0.0257647		1.30278
F02	SFVeh	0.0233893		1.18267
F03	SFVeh	0.0716702		3.62397
F04	SFVeh	0.0275854		1.39484
F05	SFVeh	0.0648912		3.28119
F42	SFVeh	0.026941		1.36226
F43	SFVeh	0.0342327		1.73096
F44	SFVeh	0.0445864		2.25449
F45	SFVeh	0.162837		8.23375
F26	SFPhe	0.120373		6.08658
F27	SFPhe	0.171017		8.64741
F28	SFPhe	0.0378281		1.91276
F29	SFPhe	0.0276945		1.40036
F30	SFPhe	0.0648282		3.278
F50	SFPhe	0.143536		7.25781
F53	SFPhe	0.0109133		0.551824
F21	SFPro	0.0194637		0.984172
F22	SFPro	0.0617571		3.12271
F23	SFPro	0.123394		6.23933
F24	SFPro	0.0197178		0.997019
F25	SFPro	0.0209277		1.0582
F46	SFPro	0.0481765		2.43602
F47	SFPro	0.0378623		1.91449
F48	SFPro	0.0334202		1.68988
F49	SFPro	0.0845591		4.27568

## Sheet: ASF_TNFa_Heart
Sample Name	Treatment	Relative Expression	CONVeh Average	Fold Change
H54	CONVeh	0.0101101	0.00902257	1.12053
H55	CONVeh	0.00623712		0.691279
H56	CONVeh	0.00829602		0.919474
H57	CONVeh	0.00550879		0.610557
H58	CONVeh	0.00744376		0.825016
H59	CONVeh	0.00572845		0.634902
H60	CONVeh	0.0160147		1.77496
H61	CONVeh	0.00997815		1.10591
H62	CONVeh	0.011886		1.31736
H74	CONPhe	0.00998065		1.10619
H75	CONPhe	0.00838855		0.929729
H76	CONPhe	0.00930692		1.03151
H78	CONPhe	0.00953666		1.05698
H79	CONPhe	0.021075		2.33581
H80	CONPhe	0.0192885		2.1378
H81	CONPhe	0.00940199		1.04205
H82	CONPhe	0.0298912		3.31293
H83	CONPhe	0.0211729		2.34666
H64	CONPro	0.0123104		1.3644
H65	CONPro	0.0111963		1.24092
H66	CONPro	0.0608222		6.74111
H67	CONPro	0.00966565		1.07127
H68	CONPro	0.0109519		1.21383
H69	CONPro	0.0752818		8.34372
H71	CONPro	0.00414554		0.459463
H72	CONPro	0.00563689		0.624754
H73	CONPro	0.00898802		0.99617
H01	SFVeh	3.89998e-06		0.000432247
H03	SFVeh	0.000177011		0.0196187
H04	SFVeh	0.000623308		0.0690832
H42	SFVeh	8.90943e-05		0.0098746
H43	SFVeh	0.000244537		0.0271028
H44	SFVeh	2.9682e-05		0.00328975
H26	SFPhe	7.58793e-05		0.00840994
H27	SFPhe	8.8602e-05		0.00982004
H28	SFPhe	0.000123725		0.0137128
H29	SFPhe	1.0451e-05		0.00115832
H30	SFPhe	0.00013358		0.0148051
H50	SFPhe	6.10704e-05		0.00676862
H51	SFPhe	2.98884e-05		0.00331262
H52	SFPhe	0.00632762		0.70131
H21	SFPro	4.53562e-05		0.00502697
H22	SFPro	0.000275395		0.0305229
H23	SFPro	0.000186684		0.0206908
H24	SFPro	7.86195e-05		0.00871365
H25	SFPro	0.000119199		0.0132112
H46	SFPro	0.000150134		0.0166398
H47	SFPro	0.000147795		0.0163806
H48	SFPro	3.12327e-05		0.00346162
H49	SFPro	2.28786e-05		0.00253571

## Sheet: ASF_TNFa_Hippocampus
Sample Name	Treatment	Relative Expression	CONVeh Average	Fold Change
Hip54	CONVeh	1.8626e-05	1.95501e-05	0.952733
Hip55	CONVeh	9.3536e-06		0.478443
Hip56	CONVeh	7.27518e-06		0.37213
Hip57	CONVeh	1.35865e-06		0.0694959
Hip58	CONVeh	1.37215e-05		0.701864
Hip59	CONVeh	8.32698e-06		0.425931
Hip61	CONVeh	3.18185e-05		1.62754
Hip62	CONVeh	7.65663e-05		3.91642
Hip63	CONVeh	8.90399e-06		0.455445
Hip74	CONPhe	9.48017e-06		0.484917
Hip76	CONPhe	9.34266e-05		4.77884
Hip77	CONPhe	3.63022e-05		1.85688
Hip78	CONPhe	4.31814e-05		2.20876
Hip79	CONPhe	6.92629e-06		0.354285
Hip80	CONPhe	4.1013e-06		0.209784
Hip81	CONPhe	9.07986e-05		4.64441
Hip82	CONPhe	8.9246e-06		0.456499
Hip83	CONPhe	2.46339e-06		0.126004
Hip65	CONPro	2.37622e-05		1.21545
Hip66	CONPro	2.03594e-05		1.0414
Hip67	CONPro	7.23355e-06		0.370001
Hip68	CONPro	1.84895e-05		0.945751
Hip69	CONPro	8.57015e-05		4.38369
Hip70	CONPro	0.000143498		7.34002
Hip72	CONPro	1.65856e-05		0.848365
Hip73	CONPro	9.76014e-06		0.499238
Hip01	SFVeh	0.000299025		15.2953
Hip02	SFVeh	0.000410304		20.9873
Hip03	SFVeh	4.15731e-05		2.12649
Hip04	SFVeh	0.000224838		11.5006
Hip05	SFVeh	0.000426172		21.799
Hip42	SFVeh	0.000153789		7.86641
Hip43	SFVeh	0.000117011		5.98519
Hip44	SFVeh	0.000113394		5.80018
Hip45	SFVeh	0.000101		5.16622
Hip26	SFPhe	9.92551e-05		5.07697
Hip27	SFPhe	6.1477e-05		3.14459
Hip28	SFPhe	0.000530977		27.1598
Hip29	SFPhe	0.00044914		22.9738
Hip30	SFPhe	0.000215637		11.03
Hip51	SFPhe	8.84881e-05		4.52623
Hip52	SFPhe	6.09885e-05		3.1196
Hip53	SFPhe	0.000168027		8.5947
Hip21	SFPro	0.000425025		21.7403
Hip22	SFPro	0.000486864		24.9034
Hip23	SFPro	0.000392569		20.0802
Hip24	SFPro	0.000217881		11.1448
Hip25	SFPro	0.000794222		40.625
Hip46	SFPro	0.000369101		18.8798
Hip47	SFPro	0.000657996		33.657
Hip48	SFPro	0.0002991		15.2992
Hip49	SFPro	0.000292272		14.9499

## Sheet: ASF_TNFa_Hypothalamus
Sample Name	Treatment	Relative Expression	CONVeh Average	Fold Change
Hyp54	CONVeh	0.000599896	0.000199804	3.00242
Hyp55	CONVeh	0.000160351		0.80254
Hyp56	CONVeh	0.00032528		1.62799
Hyp57	CONVeh	0.000250615		1.2543
Hyp58	CONVeh	0.00010089		0.504944
Hyp59	CONVeh	9.02047e-05		0.451465
Hyp60	CONVeh	4.25799e-05		0.213108
Hyp61	CONVeh	0.000279707		1.3999
Hyp62	CONVeh	9.01815e-05		0.451349
Hyp63	CONVeh	5.83388e-05		0.29198
Hyp75	CONPhe	2.66056e-05		0.133158
Hyp76	CONPhe	8.58296e-06		0.0429568
Hyp77	CONPhe	1.72698e-05		0.0864335
Hyp78	CONPhe	1.42152e-05		0.0711456
Hyp79	CONPhe	2.20011e-05		0.110113
Hyp80	CONPhe	6.01452e-05		0.30102
Hyp81	CONPhe	7.13592e-05		0.357145
Hyp82	CONPhe	3.26608e-05		0.163464
Hyp83	CONPhe	3.65739e-05		0.183049
Hyp64	CONPro	8.28195e-05		0.414503
Hyp65	CONPro	6.94218e-05		0.347449
Hyp66	CONPro	0.00011134		0.557245
Hyp68	CONPro	3.35278e-05		0.167803
Hyp69	CONPro	2.86281e-05		0.143281
Hyp70	CONPro	9.31261e-06		0.0466086
Hyp72	CONPro	3.17856e-05		0.159084
Hyp73	CONPro	1.42768e-05		0.0714539
Hyp01	SFVeh	2.73704e-05		0.136986
Hyp03	SFVeh	0.000799709		4.00246
Hyp04	SFVeh	0.000392337		1.96361
Hyp42	SFVeh	0.000343587		1.71962
Hyp43	SFVeh	0.000891295		4.46084
Hyp44	SFVeh	0.000900602		4.50742
Hyp26	SFPhe	0.000322016		1.61166
Hyp27	SFPhe	0.00038122		1.90797
Hyp28	SFPhe	0.00044944		2.2494
Hyp29	SFPhe	5.1402e-05		0.257262
Hyp30	SFPhe	0.000376081		1.88225
Hyp50	SFPhe	0.000270023		1.35144
Hyp51	SFPhe	0.000128426		0.642759
Hyp21	SFPro	0.000195637		0.979143
Hyp22	SFPro	0.00100425		5.02617
Hyp23	SFPro	0.000771717		3.86236
Hyp24	SFPro	0.000393842		1.97114
Hyp25	SFPro	0.000423151		2.11783
Hyp46	SFPro	0.000624202		3.12407
Hyp47	SFPro	0.000525609		2.63062
Hyp48	SFPro	0.000105297		0.527

## Sheet: ASF_TNFa_Liver
Sample Name	Treatment	Relative Expression	CONVeh Average	Fold Change
L54	CONVeh	1.13788e-05	1.08958e-05	1.04433
L55	CONVeh	1.52563e-05		1.40021
L56	CONVeh	1.48481e-05		1.36274
L57	CONVeh	4.22897e-06		0.38813
L59	CONVeh	1.12948e-05		1.03662
L60	CONVeh	9.55277e-06		0.876742
L62	CONVeh	9.51482e-06		0.873259
L63	CONVeh	1.10915e-05		1.01797
L74	CONPhe	9.26944e-06		0.850738
L75	CONPhe	6.9969e-06		0.642167
L76	CONPhe	7.13195e-06		0.654562
L77	CONPhe	6.65162e-06		0.610478
L78	CONPhe	3.5062e-06		0.321795
L79	CONPhe	1.45776e-05		1.33792
L80	CONPhe	2.82383e-05		2.59168
L81	CONPhe	2.19646e-05		2.01589
L82	CONPhe	1.31183e-05		1.20398
L83	CONPhe	1.37454e-05		1.26154
L64	CONPro	9.38805e-06		0.861624
L65	CONPro	1.07625e-05		0.98777
L66	CONPro	9.71175e-06		0.891333
L67	CONPro	1.03801e-05		0.952674
L69	CONPro	1.27341e-05		1.16872
L70	CONPro	1.04962e-05		0.963329
L71	CONPro	7.63889e-06		0.701088
L72	CONPro	1.37141e-05		1.25866
L73	CONPro	1.6474e-05		1.51196
L01	SFVeh	0.0133583		1226.01
L02	SFVeh	0.0468613		4300.88
L04	SFVeh	0.0419328		3848.54
L05	SFVeh	0.012171		1117.04
L42	SFVeh	0.035802		3285.86
L45	SFVeh	0.0540384		4959.59
L26	SFPhe	0.00692737		635.786
L27	SFPhe	0.0124022		1138.26
L28	SFPhe	0.0155856		1430.43
L50	SFPhe	0.0195318		1792.6
L51	SFPhe	0.007816		717.344
L52	SFPhe	0.0229214		2103.7
L53	SFPhe	0.0418291		3839.02
L21	SFPro	0.0416878		3826.06
L23	SFPro	0.060076		5513.71
L46	SFPro	0.0399589		3667.38
L47	SFPro	0.0223846		2054.44
L48	SFPro	0.0148361		1361.64
L49	SFPro	0.0107144		983.355

## Sheet: ASF_TNFa_PrefrontalCortex
Sample Name	Treatment	Relative Expression	CONVeh Average	Fold Change
FC54	CONVeh	0.000113697	0.000251412	0.452234
FC55	CONVeh	0.000381003		1.51545
FC56	CONVeh	3.82726e-05		0.152231
FC57	CONVeh	4.7526e-05		0.189036
FC58	CONVeh	0.000226134		0.899456
FC59	CONVeh	9.94002e-05		0.395368
FC60	CONVeh	0.000196379		0.781104
FC61	CONVeh	6.11407e-05		0.243189
FC62	CONVeh	0.000939612		3.73734
FC63	CONVeh	0.000410955		1.63459
FC74	CONPhe	9.54135e-05		0.379511
FC76	CONPhe	0.000192535		0.765815
FC77	CONPhe	0.000133109		0.529446
FC78	CONPhe	0.000307667		1.22376
FC82	CONPhe	3.48413e-05		0.138583
FC83	CONPhe	4.41605e-05		0.17565
FC64	CONPro	6.92154e-05		0.275307
FC66	CONPro	1.17154e-05		0.0465984
FC67	CONPro	2.38011e-05		0.0946697
FC68	CONPro	4.00471e-05		0.159289
FC69	CONPro	0.000131425		0.522748
FC71	CONPro	4.31885e-05		0.171784
FC72	CONPro	0.000219405		0.872691
FC73	CONPro	7.83268e-05		0.311548
FC01	SFVeh	0.000268645		1.06855
FC02	SFVeh	0.000481662		1.91583
FC03	SFVeh	0.000177733		0.706939
FC04	SFVeh	5.21691e-05		0.207504
FC05	SFVeh	0.00016439		0.653867
FC42	SFVeh	4.19637e-05		0.166912
FC43	SFVeh	6.11896e-05		0.243384
FC44	SFVeh	0.000162835		0.647682
FC45	SFVeh	0.000217466		0.864979
FC26	SFPhe	0.000169898		0.675775
FC27	SFPhe	0.00011566		0.460042
FC28	SFPhe	0.000119586		0.475658
FC29	SFPhe	0.000128005		0.509144
FC30	SFPhe	6.29378e-05		0.250337
FC51	SFPhe	7.54602e-05		0.300146
FC52	SFPhe	8.91432e-05		0.35457
FC53	SFPhe	0.000123748		0.492212
FC21	SFPro	0.000128642		0.511678
FC23	SFPro	6.99088e-05		0.278065
FC24	SFPro	0.000327931		1.30436
FC46	SFPro	3.83595e-05		0.152576
FC47	SFPro	0.000192392		0.765246
FC49	SFPro	0.000161045		0.640562

## Sheet: ASF_TNFa_Spleen
Sample Name	Treatment	Relative Expression	CONVeh Average	Fold Change
S54	CONVeh	0.00118276	0.0180909	0.0653789
S55	CONVeh	0.00580706		0.320993
S56	CONVeh	0.00246698		0.136366
S57	CONVeh	0.0328082		1.81352
S58	CONVeh	0.0178508		0.986726
S61	CONVeh	0.0373724		2.06581
S62	CONVeh	0.0342141		1.89123
S63	CONVeh	0.013025		0.719974
S74	CONPhe	0.00585468		0.323625
S75	CONPhe	0.000728921		0.0402921
S76	CONPhe	0.00777217		0.429618
S77	CONPhe	0.00631791		0.349231
S78	CONPhe	0.00241054		0.133246
S79	CONPhe	0.0639865		3.53694
S80	CONPhe	0.0650587		3.59621
S81	CONPhe	0.121056		6.69152
S82	CONPhe	0.0292112		1.61469
S83	CONPhe	0.00392726		0.217085
S64	CONPro	0.0102059		0.564146
S65	CONPro	0.000650352		0.0359491
S66	CONPro	0.00027352		0.0151192
S67	CONPro	0.00463164		0.256021
S68	CONPro	0.00445123		0.246048
S69	CONPro	0.00503965		0.278574
S70	CONPro	0.000723981		0.0400191
S72	CONPro	0.00413517		0.228577
S73	CONPro	0.00426372		0.235683
S01	SFVeh	2.29175		126.68
S02	SFVeh	0.697005		38.5279
S03	SFVeh	0.433642		23.9701
S04	SFVeh	0.305913		16.9098
S05	SFVeh	0.833704		46.0841
S42	SFVeh	0.263925		14.5889
S43	SFVeh	1.50391		83.1305
S44	SFVeh	0.46893		25.9208
S45	SFVeh	1.50224		83.0383
S26	SFPhe	0.660937		36.5342
S28	SFPhe	0.497752		27.514
S30	SFPhe	0.872967		48.2545
S50	SFPhe	1.02678		56.7565
S52	SFPhe	0.986037		54.5046
S53	SFPhe	0.925306		51.1476
S21	SFPro	0.701023		38.75
S22	SFPro	1.0746		59.3999
S23	SFPro	0.437198		24.1667
S24	SFPro	1.27252		70.3405
S25	SFPro	0.737561		40.7697
S47	SFPro	0.95506		52.7923
