# Supplementary material for: Alpha- and beta- adrenergic receptors regulate inflammatory responses to acute and chronic sleep fragmentation in mice
Source: PeerJ. 2021 Jun 24;9:e11616. doi: 10.7717/peerj.11616 (PMC8236227; doi:10.7717/peerj.11616)
Supplement: Supplemental Information 3 — Each data point indicates the mRNA expression level of the target gene. [file peerj-09-11616-s003.xlsx]

## Sheet: ASF_TGFB_Fat
Sample Name	Treatment	Relative Expression	CONVeh Average	Fold Change
F54	CONVeh	0.0726971	0.0479993	1.51455
F55	CONVeh	0.0358363		0.746601
F56	CONVeh	0.0431501		0.898974
F57	CONVeh	0.0314172		0.654535
F58	CONVeh	0.0516174		1.07538
F59	CONVeh	0.0594711		1.239
F61	CONVeh	0.0430265		0.896399
F62	CONVeh	0.0476657		0.99305
F63	CONVeh	0.0471121		0.981516
F75	CONPhe	0.134178		2.79541
F76	CONPhe	0.143914		2.99824
F77	CONPhe	0.122333		2.54864
F78	CONPhe	0.137516		2.86495
F79	CONPhe	0.11082		2.30879
F80	CONPhe	0.122208		2.54604
F81	CONPhe	0.129926		2.70683
F82	CONPhe	0.103066		2.14723
F83	CONPhe	0.163991		3.41654
F64	CONPro	0.0460725		0.959857
F65	CONPro	0.0286987		0.597898
F66	CONPro	0.0675714		1.40776
F68	CONPro	0.411154		8.56583
F69	CONPro	0.694005		14.4586
F70	CONPro	0.0557089		1.16062
F71	CONPro	0.0438772		0.914123
F72	CONPro	0.0763485		1.59062
F73	CONPro	0.0548552		1.14283
F02	SFVeh	11.9448		248.853
F03	SFVeh	47.2351		984.079
F04	SFVeh	43.5977		908.298
F42	SFVeh	21.2337		442.375
F43	SFVeh	29.6815		618.374
F44	SFVeh	40.2059		837.635
F45	SFVeh	51.7211		1077.54
F26	SFPhe	23.4904		489.39
F28	SFPhe	23.9225		498.392
F29	SFPhe	13.6481		284.34
F30	SFPhe	31.2119		650.258
F50	SFPhe	30.4329		634.027
F53	SFPhe	27.0396		563.333
F21	SFPro	16.5886		345.601
F22	SFPro	10.6077		220.998
F23	SFPro	15.945		332.193
F24	SFPro	48.538		1011.22
F25	SFPro	12.563		261.733
F46	SFPro	29.0157		604.503
F47	SFPro	40.9502		853.143
F48	SFPro	64.8104		1350.24
F49	SFPro	98.1211		2044.22

## Sheet: ASF_TGFB_Heart
Sample Name	Treatment	Relative Expression	CONVeh Average	Fold Change
H54	CONVeh	0.0505513	0.0568768	0.888787
H55	CONVeh	0.0339234		0.596437
H56	CONVeh	0.0512476		0.901028
H57	CONVeh	0.034696		0.61002
H58	CONVeh	0.0548052		0.963577
H59	CONVeh	0.0337118		0.592716
H60	CONVeh	0.103329		1.81671
H61	CONVeh	0.0454435		0.798982
H62	CONVeh	0.050647		0.890468
H63	CONVeh	0.110413		1.94127
H74	CONPhe	0.0359327		0.631764
H75	CONPhe	0.0365883		0.643291
H76	CONPhe	0.0464681		0.816996
H77	CONPhe	0.121477		2.1358
H78	CONPhe	0.0617429		1.08555
H79	CONPhe	0.0478149		0.840675
H80	CONPhe	0.0569851		1.0019
H81	CONPhe	0.0453157		0.796734
H82	CONPhe	0.0898155		1.57912
H83	CONPhe	0.0793514		1.39515
H64	CONPro	0.0373324		0.656374
H65	CONPro	0.0344132		0.605048
H66	CONPro	0.169301		2.97662
H67	CONPro	0.0343905		0.604649
H68	CONPro	0.0411973		0.724326
H70	CONPro	0.0292425		0.514137
H71	CONPro	0.0215185		0.378334
H72	CONPro	0.035109		0.617281
H73	CONPro	0.0382428		0.67238
H01	SFVeh	3.46166		60.8625
H02	SFVeh	3.56832		62.7377
H03	SFVeh	3.9808		69.9898
H04	SFVeh	5.60754		98.591
H05	SFVeh	5.87011		103.207
H42	SFVeh	1.23106		21.6444
H44	SFVeh	2.14219		37.6637
H45	SFVeh	1.71059		30.0754
H26	SFPhe	4.30258		75.6474
H27	SFPhe	2.7986		49.2046
H28	SFPhe	2.02574		35.6163
H29	SFPhe	1.35713		23.8609
H30	SFPhe	1.20035		21.1043
H50	SFPhe	2.67942		47.1092
H51	SFPhe	2.45665		43.1925
H52	SFPhe	1.37306		24.141
H53	SFPhe	4.22906		74.3548
H21	SFPro	0.629407		11.0662
H22	SFPro	1.34457		23.6401
H23	SFPro	0.688542		12.1058
H24	SFPro	0.86905		15.2795
H46	SFPro	1.3668		24.0309
H47	SFPro	1.90948		33.5721
H48	SFPro	1.71788		30.2035
H49	SFPro	0.928214		16.3197

## Sheet: ASF_TGFB_Hippocampus
Sample Name	Treatment	Relative Expression	CONVeh Average	Fold Change
Hip54	CONVeh	0.0641142	0.0313332	2.0462
Hip55	CONVeh	0.032387		1.03363
Hip56	CONVeh	0.0254656		0.812734
Hip57	CONVeh	0.0282999		0.903192
Hip58	CONVeh	0.0314884		1.00495
Hip59	CONVeh	0.0462882		1.47729
Hip60	CONVeh	0.0263844		0.842057
Hip61	CONVeh	0.0237949		0.759414
Hip62	CONVeh	0.0174761		0.557749
Hip63	CONVeh	0.0176337		0.562779
Hip74	CONPhe	0.0280411		0.894933
Hip75	CONPhe	0.0298258		0.95189
Hip76	CONPhe	0.0243117		0.775907
Hip77	CONPhe	0.0484134		1.54511
Hip78	CONPhe	0.0465294		1.48499
Hip79	CONPhe	0.0335391		1.0704
Hip80	CONPhe	0.0734564		2.34436
Hip81	CONPhe	0.0622932		1.98809
Hip82	CONPhe	0.114798		3.66377
Hip83	CONPhe	0.111567		3.56066
Hip64	CONPro	0.0525499		1.67713
Hip65	CONPro	0.0390747		1.24707
Hip66	CONPro	0.026456		0.844344
Hip67	CONPro	0.025272		0.806557
Hip68	CONPro	0.0192881		0.615579
Hip69	CONPro	0.0655362		2.09159
Hip70	CONPro	0.0481482		1.53665
Hip71	CONPro	0.0173028		0.552219
Hip72	CONPro	0.0208802		0.666391
Hip73	CONPro	0.0283636		0.905223
Hip01	SFVeh	5.80187		185.167
Hip02	SFVeh	3.6139		115.338
Hip03	SFVeh	4.20196		134.106
Hip04	SFVeh	4.10852		131.123
Hip05	SFVeh	5.87095		187.371
Hip42	SFVeh	1.76054		56.1875
Hip43	SFVeh	1.56237		49.8632
Hip44	SFVeh	1.67568		53.4793
Hip45	SFVeh	2.57702		82.2457
Hip26	SFPhe	1.88954		60.3045
Hip27	SFPhe	1.3125		41.8885
Hip28	SFPhe	2.53728		80.9772
Hip29	SFPhe	2.25602		72.0009
Hip30	SFPhe	1.21584		38.8035
Hip50	SFPhe	2.42613		77.43
Hip51	SFPhe	2.96535		94.6392
Hip21	SFPro	4.38938		140.087
Hip22	SFPro	3.94096		125.776
Hip23	SFPro	2.55258		81.4656
Hip24	SFPro	4.2369		135.221
Hip25	SFPro	8.42079		268.749
Hip46	SFPro	2.64403		84.3841
Hip47	SFPro	1.5969		50.965
Hip48	SFPro	1.63504		52.1822
Hip49	SFPro	1.40052		44.6976

## Sheet: ASF_TGFB_Hypothalamus
Sample Name	Treatment	Relative Expression	CONVeh Average	Fold Change
Hyp55	CONVeh	0.0808793	0.0678087	1.19276
Hyp56	CONVeh	0.0763		1.12522
Hyp57	CONVeh	0.0796474		1.17459
Hyp58	CONVeh	0.0686943		1.01306
Hyp59	CONVeh	0.0581463		0.857505
Hyp60	CONVeh	0.0532434		0.7852
Hyp61	CONVeh	0.0723349		1.06675
Hyp62	CONVeh	0.0594487		0.876711
Hyp63	CONVeh	0.061584		0.908202
Hyp74	CONPhe	0.0411808		0.607309
Hyp75	CONPhe	0.0551179		0.812844
Hyp77	CONPhe	0.0422683		0.623346
Hyp78	CONPhe	0.0462254		0.681704
Hyp79	CONPhe	0.0406687		0.599757
Hyp80	CONPhe	0.050283		0.741542
Hyp83	CONPhe	0.0278168		0.410225
Hyp64	CONPro	0.108851		1.60527
Hyp65	CONPro	0.0554704		0.818042
Hyp66	CONPro	0.0444353		0.655304
Hyp67	CONPro	0.0575704		0.849012
Hyp68	CONPro	0.0424465		0.625974
Hyp69	CONPro	0.0824242		1.21554
Hyp70	CONPro	0.0346406		0.510858
Hyp71	CONPro	0.0574788		0.847661
Hyp72	CONPro	0.0356687		0.52602
Hyp73	CONPro	0.0321812		0.474588
Hyp01	SFVeh	2.14595		31.6472
Hyp02	SFVeh	5.93427		87.5148
Hyp03	SFVeh	2.512		37.0454
Hyp04	SFVeh	3.59586		53.0294
Hyp05	SFVeh	2.88092		42.486
Hyp42	SFVeh	1.57309		23.1989
Hyp43	SFVeh	2.92291		43.1052
Hyp44	SFVeh	1.18231		17.436
Hyp45	SFVeh	1.58573		23.3853
Hyp26	SFPhe	1.63698		24.1412
Hyp27	SFPhe	1.99726		29.4544
Hyp28	SFPhe	2.12476		31.3346
Hyp29	SFPhe	1.05205		15.5149
Hyp30	SFPhe	1.34639		19.8558
Hyp50	SFPhe	1.90642		28.1146
Hyp52	SFPhe	1.20565		17.7801
Hyp21	SFPro	2.73469		40.3295
Hyp22	SFPro	1.92362		28.3683
Hyp23	SFPro	3.7786		55.7245
Hyp24	SFPro	3.01383		44.4461
Hyp25	SFPro	2.66233		39.2624
Hyp46	SFPro	2.71592		40.0528
Hyp47	SFPro	1.07616		15.8705
Hyp48	SFPro	1.28999		19.0239
Hyp49	SFPro	1.42158		20.9645

## Sheet: ASF_TGFB_Liver
Sample Name	Treatment	Relative Expression	CONVeh Average	Fold Change
L54	CONVeh	0.0060243	0.00647935	0.92977
L55	CONVeh	0.00664996		1.02633
L56	CONVeh	0.0054885		0.847076
L57	CONVeh	0.00452169		0.697862
L58	CONVeh	0.00546582		0.843575
L59	CONVeh	0.00554355		0.855572
L60	CONVeh	0.00627773		0.968883
L61	CONVeh	0.00975356		1.50533
L62	CONVeh	0.00869114		1.34136
L63	CONVeh	0.00637723		0.984239
L74	CONPhe	0.003998		0.617038
L75	CONPhe	0.00323853		0.499824
L76	CONPhe	0.00594576		0.917648
L77	CONPhe	0.00501058		0.773315
L78	CONPhe	0.00318032		0.490839
L79	CONPhe	0.00468414		0.722934
L80	CONPhe	0.00713109		1.10059
L81	CONPhe	0.00737054		1.13754
L82	CONPhe	0.0114421		1.76593
L83	CONPhe	0.00652307		1.00675
L64	CONPro	0.0074556		1.15067
L65	CONPro	0.00506695		0.782015
L66	CONPro	0.00506897		0.782327
L67	CONPro	0.00847701		1.30831
L68	CONPro	0.00486877		0.751429
L69	CONPro	0.00410887		0.634148
L70	CONPro	0.00873504		1.34814
L71	CONPro	0.0126266		1.94875
L72	CONPro	0.00780862		1.20516
L73	CONPro	0.00926642		1.43015
L01	SFVeh	0.632371		97.5979
L02	SFVeh	1.35911		209.76
L04	SFVeh	3.23539		499.339
L05	SFVeh	0.661173		102.043
L42	SFVeh	3.3296		513.878
L44	SFVeh	0.777125		119.939
L45	SFVeh	3.43946		530.834
L29	SFPhe	0.579685		89.4666
L30	SFPhe	3.17239		489.616
L50	SFPhe	2.26758		349.971
L51	SFPhe	0.655468		101.163
L52	SFPhe	0.855276		132
L53	SFPhe	5.01629		774.196
L21	SFPro	4.05049		625.139
L22	SFPro	0.996506		153.797
L23	SFPro	4.66933		720.649
L25	SFPro	0.216862		33.4698
L46	SFPro	1.8727		289.027
L47	SFPro	2.7545		425.119
L48	SFPro	1.11905		172.71
L49	SFPro	0.757951		116.979

## Sheet: ASF_TGFB_PrefrontalCortex
Sample Name	Treatment	Relative Expression	CONVeh Average	Fold Change
FC54	CONVeh	0.137423	0.126336	1.08775
FC55	CONVeh	0.124824		0.988032
FC56	CONVeh	0.154517		1.22306
FC57	CONVeh	0.0983962		0.778843
FC58	CONVeh	0.0997979		0.789937
FC59	CONVeh	0.134357		1.06348
FC60	CONVeh	0.066259		0.524464
FC61	CONVeh	0.115341		0.912964
FC62	CONVeh	0.226544		1.79318
FC63	CONVeh	0.105907		0.83829
FC74	CONPhe	0.109767		0.868849
FC75	CONPhe	0.0606303		0.479912
FC76	CONPhe	0.0901843		0.713842
FC77	CONPhe	0.124142		0.982626
FC78	CONPhe	0.159022		1.25872
FC79	CONPhe	0.199478		1.57894
FC80	CONPhe	0.101542		0.803742
FC81	CONPhe	0.0787949		0.623691
FC82	CONPhe	0.183833		1.4551
FC83	CONPhe	0.100835		0.798143
FC64	CONPro	0.118315		0.936505
FC65	CONPro	0.0732326		0.579663
FC66	CONPro	0.120603		0.954618
FC67	CONPro	0.156656		1.23999
FC68	CONPro	0.0799027		0.632459
FC69	CONPro	0.177631		1.40602
FC70	CONPro	0.142233		1.12583
FC71	CONPro	0.0828965		0.656157
FC72	CONPro	0.0835262		0.661141
FC73	CONPro	0.15723		1.24453
FC01	SFVeh	5.38337		42.6113
FC02	SFVeh	6.50717		51.5066
FC03	SFVeh	2.99372		23.6964
FC04	SFVeh	6.77547		53.6304
FC05	SFVeh	9.45295		74.8236
FC42	SFVeh	4.24534		33.6034
FC43	SFVeh	5.45221		43.1562
FC44	SFVeh	4.80584		38.04
FC45	SFVeh	5.21858		41.307
FC26	SFPhe	6.16504		48.7986
FC27	SFPhe	5.32361		42.1384
FC28	SFPhe	2.92727		23.1705
FC29	SFPhe	3.87982		30.7102
FC30	SFPhe	3.73405		29.5564
FC50	SFPhe	2.83698		22.4558
FC51	SFPhe	4.45251		35.2433
FC52	SFPhe	7.86566		62.2597
FC53	SFPhe	6.12764		48.5026
FC21	SFPro	8.48983		67.2002
FC23	SFPro	6.40974		50.7355
FC24	SFPro	9.0657		71.7584
FC25	SFPro	6.85398		54.2518
FC46	SFPro	2.83442		22.4355
FC47	SFPro	3.34782		26.4992
FC48	SFPro	4.03567		31.9438
FC49	SFPro	4.57924		36.2464

## Sheet: ASF_TGFB_Spleen
Sample Name	Treatment	Relative Expression	CONVeh Average	Fold Change
S54	CONVeh	0.0805253	0.133255	0.604297
S55	CONVeh	0.128434		0.963828
S56	CONVeh	0.0728297		0.546546
S57	CONVeh	0.114519		0.859403
S58	CONVeh	0.0604265		0.453467
S59	CONVeh	0.224043		1.68131
S60	CONVeh	0.168995		1.26821
S61	CONVeh	0.118658		0.890464
S62	CONVeh	0.227393		1.70645
S63	CONVeh	0.136721		1.02602
S74	CONPhe	0.118536		0.889544
S75	CONPhe	0.139327		1.04557
S76	CONPhe	0.208687		1.56608
S77	CONPhe	0.149928		1.12513
S78	CONPhe	0.124174		0.931859
S79	CONPhe	0.0323517		0.242781
S80	CONPhe	0.0863562		0.648054
S81	CONPhe	0.0285883		0.214539
S82	CONPhe	0.020467		0.153593
S83	CONPhe	0.187363		1.40606
S64	CONPro	0.119304		0.895309
S65	CONPro	0.170182		1.27712
S67	CONPro	0.239871		1.8001
S68	CONPro	0.350261		2.62851
S70	CONPro	0.119853		0.899427
S71	CONPro	0.0577425		0.433325
S72	CONPro	0.171235		1.28502
S73	CONPro	0.185146		1.38941
S01	SFVeh	12.0484		90.4165
S02	SFVeh	11.4728		86.097
S03	SFVeh	5.59918		42.0187
S04	SFVeh	4.20038		31.5215
S05	SFVeh	11.1997		84.0476
S42	SFVeh	3.19233		23.9567
S43	SFVeh	18.4498		138.456
S44	SFVeh	9.22638		69.2388
S45	SFVeh	11.9495		89.6746
S26	SFPhe	16.3629		122.794
S28	SFPhe	8.63725		64.8177
S30	SFPhe	19.8333		148.838
S50	SFPhe	23.3223		175.021
S52	SFPhe	4.70888		35.3375
S53	SFPhe	4.53131		34.005
S21	SFPro	7.78677		58.4353
S22	SFPro	14.8035		111.092
S23	SFPro	5.35421		40.1803
S24	SFPro	36.9015		276.925
S25	SFPro	13.8038		103.59
S47	SFPro	9.61214		72.1337
