# Supplementary material for: Alpha- and beta- adrenergic receptors regulate inflammatory responses to acute and chronic sleep fragmentation in mice
Source: PeerJ. 2021 Jun 24;9:e11616. doi: 10.7717/peerj.11616 (PMC8236227; doi:10.7717/peerj.11616)
Supplement: Supplemental Information 4 — Each data point indicates the mRNA expression level of the target gene. [file peerj-09-11616-s004.xlsx]

## Sheet: CSF_IL1B_Fat
Sample Name	Treatment	Relative Expression	CONVeh Average	Fold Change
F21	CONVeh	0.000188247	0.000483868	0.389047
F22	CONVeh	0.0001044		0.215762
F23	CONVeh	8.88e-05		0.183521
F24	CONVeh	0.000143825		0.29724
F25	CONVeh	7.04e-05		0.145494
F27	CONVeh	0.00137203		2.83555
F28	CONVeh	0.00052055		1.07581
F29	CONVeh	0.00147391		3.04609
F30	CONVeh	0.00039265		0.811482
F01	CONPhe	0.00026265		0.542814
F02	CONPhe	0.000137615		0.284406
F03	CONPhe	0.000127224		0.262931
F04	CONPhe	0.000624851		1.29137
F05	CONPhe	0.000196191		0.405464
F06	CONPhe	0.000194751		0.402488
F07	CONPhe	0.000303688		0.627626
F08	CONPhe	0.000152907		0.31601
F09	CONPhe	0.000211757		0.437634
F10	CONPhe	0.000592272		1.22404
F11	CONPro	0.000317485		0.65614
F12	CONPro	0.000189866		0.392393
F13	CONPro	0.000246142		0.508697
F14	CONPro	0.000767086		1.58532
F16	CONPro	0.000289535		0.598377
F18	CONPro	0.000464771		0.960534
F19	CONPro	0.000357545		0.738932
F20	CONPro	0.000216731		0.447914
F52	CSFVeh	0.000453889		0.938044
F53	CSFVeh	0.00113127		2.33797
F54	CSFVeh	0.00166843		3.44812
F55	CSFVeh	0.000467693		0.966572
F56	CSFVeh	0.00205223		4.24131
F58	CSFVeh	0.00827202		17.0956
F59	CSFVeh	0.00218789		4.52168
F60	CSFVeh	0.000606449		1.25334
F31	CSFPhe	0.000522849		1.08056
F32	CSFPhe	0.00137692		2.84565
F34	CSFPhe	0.000198851		0.410962
F36	CSFPhe	0.000684671		1.415
F37	CSFPhe	0.00073744		1.52405
F38	CSFPhe	0.000641019		1.32478
F39	CSFPhe	0.00102096		2.11001
F40	CSFPhe	0.00157513		3.2553
F41	CSFPro	0.00199303		4.11895
F42	CSFPro	0.00366016		7.56438
F43	CSFPro	0.00118813		2.45549
F44	CSFPro	0.00111903		2.31269
F45	CSFPro	0.000868918		1.79578
F46	CSFPro	0.00172054		3.55581
F47	CSFPro	0.00426228		8.80877
F49	CSFPro	0.0139454		28.8208
F50	CSFPro	0.000433842		0.896613

## Sheet: CSF_IL1B_Heart
Sample Name	Treatment	Relative Expression	CONVeh Average	Fold Change
H22	CONVeh	0.000561657	0.00109321	0.513769
H23	CONVeh	0.000471801		0.431574
H24	CONVeh	0.0010176		0.93084
H27	CONVeh	0.00203366		1.86027
H28	CONVeh	0.00134232		1.22787
H30	CONVeh	0.00113222		1.03568
H01	CONPhe	0.00389282		3.56091
H03	CONPhe	0.000384573		0.351783
H05	CONPhe	7.99569e-05		0.0731396
H06	CONPhe	0.000319329		0.292102
H07	CONPhe	0.000322413		0.294923
H08	CONPhe	0.000745787		0.682199
H09	CONPhe	0.000202378		0.185123
H10	CONPhe	0.000577521		0.52828
H11	CONPro	0.000463219		0.423724
H12	CONPro	0.000379922		0.347529
H13	CONPro	0.00102192		0.934789
H14	CONPro	0.000785487		0.718514
H15	CONPro	0.00106298		0.972344
H16	CONPro	0.000199798		0.182763
H17	CONPro	0.000438215		0.400852
H18	CONPro	0.000449132		0.410838
H19	CONPro	0.000214295		0.196024
H20	CONPro	0.000226722		0.207391
H51	CSFVeh	0.00541515		4.95344
H53	CSFVeh	0.00198869		1.81913
H54	CSFVeh	0.00104637		0.957151
H56	CSFVeh	0.00399723		3.65641
H57	CSFVeh	0.00599133		5.48049
H59	CSFVeh	0.0285188		26.0872
H60	CSFVeh	0.0106027		9.69873
H31	CSFPhe	0.000871568		0.797256
H32	CSFPhe	0.00820415		7.50464
H34	CSFPhe	0.0010787		0.986726
H35	CSFPhe	0.00210769		1.92799
H36	CSFPhe	0.00170379		1.55852
H37	CSFPhe	0.000617166		0.564545
H38	CSFPhe	0.000251609		0.230156
H40	CSFPhe	0.00165716		1.51586
H42	CSFPro	0.00191677		1.75334
H43	CSFPro	0.0012685		1.16035
H45	CSFPro	0.00158625		1.451
H46	CSFPro	0.00129919		1.18842
H47	CSFPro	0.00500077		4.57439
H48	CSFPro	0.00305047		2.79038
H50	CSFPro	0.000587532		0.537437

## Sheet: CSF_IL1B_Hippocampus
Sample Name	Treatment	Relative Expression	CONVeh Average	Fold Change
HIP21	CONVeh	2.21218e-07	8.63033e-07	0.256326
HIP22	CONVeh	1.88993e-07		0.218987
HIP23	CONVeh	1.98681e-07		0.230212
HIP24	CONVeh	3.4653e-07		0.401526
HIP25	CONVeh	2.0949e-07		0.242737
HIP26	CONVeh	1.40234e-06		1.6249
HIP29	CONVeh	9.48285e-07		1.09878
HIP30	CONVeh	3.38873e-06		3.92653
HIP01	CONPhe	1.923e-06		2.22819
HIP02	CONPhe	7.20826e-07		0.835224
HIP03	CONPhe	5.50749e-07		0.638155
HIP04	CONPhe	2.29308e-07		0.2657
HIP05	CONPhe	2.10872e-07		0.244338
HIP06	CONPhe	8.52919e-08		0.098828
HIP07	CONPhe	1.24628e-07		0.144407
HIP08	CONPhe	5.62307e-07		0.651547
HIP09	CONPhe	1.14253e-07		0.132385
HIP10	CONPhe	8.47436e-07		0.981927
HIP11	CONPro	7.1938e-07		0.833548
HIP13	CONPro	1.08261e-07		0.125442
HIP14	CONPro	8.91661e-07		1.03317
HIP15	CONPro	3.70618e-07		0.429436
HIP16	CONPro	3.95504e-07		0.458272
HIP17	CONPro	4.78743e-07		0.554721
HIP18	CONPro	6.46532e-07		0.749139
HIP19	CONPro	3.63729e-07		0.421454
HIP20	CONPro	3.7241e-07		0.431513
HIP51	CSFVeh	1.88462e-06		2.18372
HIP52	CSFVeh	7.03772e-07		0.815463
HIP53	CSFVeh	7.47753e-07		0.866424
HIP54	CSFVeh	9.49026e-07		1.09964
HIP56	CSFVeh	2.0343e-06		2.35715
HIP57	CSFVeh	3.24775e-06		3.76318
HIP58	CSFVeh	8.41015e-06		9.74487
HIP59	CSFVeh	4.89899e-06		5.67648
HIP60	CSFVeh	1.80411e-06		2.09043
HIP31	CSFPhe	1.26256e-05		14.6293
HIP32	CSFPhe	3.64295e-06		4.2211
HIP33	CSFPhe	7.78123e-07		0.901614
HIP34	CSFPhe	7.76517e-07		0.899753
HIP35	CSFPhe	1.08e-06		1.2514
HIP36	CSFPhe	1.08799e-06		1.26066
HIP37	CSFPhe	2.61391e-06		3.02875
HIP38	CSFPhe	6.56714e-06		7.60937
HIP40	CSFPhe	9.60543e-07		1.11298
HIP41	CSFPro	9.73192e-06		11.2764
HIP42	CSFPro	5.40482e-06		6.26259
HIP44	CSFPro	1.18366e-05		13.7151
HIP48	CSFPro	5.43056e-07		0.629241
HIP49	CSFPro	2.64353e-06		3.06307
HIP50	CSFPro	1.17286e-06		1.359

## Sheet: CSF_IL1B_Hypothalamus
Sample Name	Treatment	Relative Expression	CONVeh Average	Fold Change
HYP51	CONVeh	1.68451e-08	1.00191e-08	1.6813
HYP52	CONVeh	2.05035e-08		2.04645
HYP53	CONVeh	4.71722e-09		0.470824
HYP54	CONVeh	9.99997e-10		0.0998094
HYP55	CONVeh	8.66153e-09		0.864504
HYP56	CONVeh	3.92928e-09		0.39218
HYP57	CONVeh	2.65599e-08		2.65093
HYP58	CONVeh	1.69528e-08		1.69205
HYP59	CONVeh	4.0105e-10		0.0400287
HYP60	CONVeh	6.20311e-10		0.061913
HYP31	CONPhe	5.51759e-08		5.50709
HYP32	CONPhe	1.0633e-07		10.6128
HYP33	CONPhe	7.39793e-08		7.38385
HYP35	CONPhe	4.68751e-08		4.67859
HYP36	CONPhe	1.74282e-08		1.7395
HYP37	CONPhe	4.44533e-08		4.43687
HYP38	CONPhe	1.89007e-08		1.88647
HYP39	CONPhe	3.80833e-08		3.80108
HYP40	CONPhe	5.11137e-08		5.10164
HYP43	CONPro	2.03296e-07		20.2909
HYP44	CONPro	2.41756e-07		24.1296
HYP46	CONPro	2.79419e-08		2.78887
HYP47	CONPro	8.10904e-08		8.09361
HYP48	CONPro	1.24815e-07		12.4577
HYP49	CONPro	6.75932e-08		6.74646
HYP50	CONPro	3.33972e-07		33.3336
HYP21	CSFVeh	1.6974e-07		16.9417
HYP22	CSFVeh	1.46245e-08		1.45967
HYP23	CSFVeh	8.58103e-08		8.5647
HYP24	CSFVeh	3.20153e-08		3.19544
HYP25	CSFVeh	1.68013e-08		1.67693
HYP26	CSFVeh	2.66177e-07		26.567
HYP27	CSFVeh	6.01917e-07		60.0771
HYP28	CSFVeh	1.6176e-08		1.61452
HYP29	CSFVeh	9.93049e-07		99.1159
HYP30	CSFVeh	2.25599e-07		22.517
HYP01	CSFPhe	7.80292e-07		77.8807
HYP02	CSFPhe	2.48685e-07		24.8212
HYP03	CSFPhe	7.27438e-07		72.6054
HYP04	CSFPhe	1.83273e-07		18.2924
HYP05	CSFPhe	2.68071e-07		26.7561
HYP06	CSFPhe	2.3763e-07		23.7178
HYP07	CSFPhe	1.32083e-07		13.1832
HYP08	CSFPhe	1.73289e-07		17.2959
HYP09	CSFPhe	4.37961e-07		43.7127
HYP11	CSFPro	3.1492e-07		31.4321
HYP12	CSFPro	2.95111e-07		29.4549
HYP13	CSFPro	8.07524e-07		80.5987
HYP14	CSFPro	4.78199e-07		47.7289
HYP15	CSFPro	7.4053e-07		73.9121
HYP16	CSFPro	2.36517e-07		23.6067
HYP18	CSFPro	2.60735e-07		26.0239
HYP19	CSFPro	3.14255e-07		31.3657
HYP20	CSFPro	4.76313e-07		47.5406

## Sheet: CSF_IL1B_Liver
Sample Name	Treatment	Relative Expression	CONVeh Average	Fold Change
L51	CONVeh	0.0103684	0.192877	0.0537564
L52	CONVeh	0.00789355		0.0409253
L53	CONVeh	0.0527017		0.273239
L54	CONVeh	0.0366207		0.189865
L55	CONVeh	0.00174296		0.00903665
L56	CONVeh	0.0162195		0.0840924
L57	CONVeh	0.991873		5.14251
L58	CONVeh	0.551611		2.85991
L59	CONVeh	0.0668655		0.346674
L31	CONPhe	0.188475		0.977175
L32	CONPhe	0.0355268		0.184194
L33	CONPhe	0.011394		0.0590738
L34	CONPhe	0.417994		2.16715
L36	CONPhe	0.254184		1.31785
L37	CONPhe	0.134592		0.697809
L38	CONPhe	0.00165413		0.00857607
L39	CONPhe	0.0664653		0.344599
L40	CONPhe	0.00738461		0.0382866
L41	CONPro	0.0446518		0.231504
L42	CONPro	0.0504201		0.26141
L43	CONPro	0.0157278		0.0815431
L44	CONPro	0.0793759		0.411535
L46	CONPro	0.0112108		0.0581242
L47	CONPro	0.00756034		0.0391977
L50	CONPro	0.0188516		0.0977387
L21	CSFVeh	0.669987		3.47365
L22	CSFVeh	0.328147		1.70132
L23	CSFVeh	0.0134074		0.0695128
L24	CSFVeh	0.757928		3.92959
L25	CSFVeh	0.0193162		0.100148
L27	CSFVeh	0.0859838		0.445795
L29	CSFVeh	0.20074		1.04076
L30	CSFVeh	0.34204		1.77336
L03	CSFPhe	0.0992693		0.514676
L04	CSFPhe	0.179612		0.931224
L06	CSFPhe	0.391917		2.03195
L08	CSFPhe	0.227524		1.17963
L09	CSFPhe	0.031442		0.163016
L10	CSFPhe	0.0836649		0.433773
L11	CSFPro	0.0234819		0.121746
L12	CSFPro	0.0135329		0.0701631
L13	CSFPro	0.213955		1.10928
L14	CSFPro	0.0358412		0.185824
L15	CSFPro	0.278622		1.44456
L16	CSFPro	0.0151432		0.078512
L17	CSFPro	0.0333365		0.172838
L18	CSFPro	0.0183762		0.0952741
L19	CSFPro	0.242004		1.2547

## Sheet: CSF_IL1B_PrefrontalCortex
Sample Name	Treatment	Relative Expression	CONVeh Average	Fold Change
FC25	CONVeh	2.5561e-06	1.20807e-06	2.11586
FC26	CONVeh	2.02615e-06		1.67718
FC27	CONVeh	1.19412e-06		0.988454
FC28	CONVeh	6.05734e-07		0.501407
FC29	CONVeh	3.487e-07		0.288643
FC30	CONVeh	5.17603e-07		0.428455
FC01	CONPhe	4.50421e-07		0.372844
FC02	CONPhe	1.45334e-06		1.20303
FC03	CONPhe	5.18433e-07		0.429142
FC04	CONPhe	1.65328e-07		0.136853
FC05	CONPhe	2.39502e-07		0.198252
FC06	CONPhe	1.17034e-06		0.96877
FC07	CONPhe	2.06193e-07		0.17068
FC08	CONPhe	2.84642e-07		0.235618
FC09	CONPhe	2.39146e-07		0.197957
FC10	CONPhe	5.47393e-07		0.453114
FC11	CONPro	2.90503e-07		0.240469
FC12	CONPro	3.79465e-06		3.14109
FC13	CONPro	6.62584e-07		0.548466
FC14	CONPro	4.41897e-07		0.365788
FC15	CONPro	6.79722e-07		0.562652
FC16	CONPro	1.5353e-06		1.27087
FC17	CONPro	1.45936e-06		1.20801
FC18	CONPro	7.29345e-07		0.603729
FC19	CONPro	9.08108e-07		0.751703
FC20	CONPro	2.62181e-06		2.17025
FC51	CSFVeh	3.88471e-06		3.21564
FC52	CSFVeh	4.05039e-06		3.35278
FC54	CSFVeh	4.46056e-06		3.69231
FC56	CSFVeh	4.73732e-06		3.9214
FC57	CSFVeh	3.38757e-05		28.0412
FC58	CSFVeh	3.76931e-05		31.2011
FC59	CSFVeh	2.33144e-05		19.2989
FC60	CSFVeh	7.90486e-06		6.54339
FC31	CSFPhe	4.15173e-07		0.343667
FC33	CSFPhe	9.0538e-07		0.749445
FC34	CSFPhe	2.58289e-06		2.13803
FC35	CSFPhe	4.29867e-07		0.35583
FC36	CSFPhe	3.9115e-07		0.323781
FC37	CSFPhe	2.23022e-06		1.8461
FC38	CSFPhe	2.49667e-06		2.06666
FC39	CSFPhe	8.0307e-07		0.664756
FC40	CSFPhe	2.01871e-06		1.67102
FC41	CSFPro	4.11724e-07		0.340812
FC45	CSFPro	2.18426e-06		1.80806
FC46	CSFPro	1.86692e-06		1.54538
FC47	CSFPro	2.80134e-06		2.31886
FC48	CSFPro	6.91667e-06		5.7254
FC49	CSFPro	3.96586e-06		3.28281
FC50	CSFPro	4.03586e-06		3.34076

## Sheet: CSF_IL1B_Spleen
Sample Name	Treatment	Relative Expression	CONVeh Average	Fold Change
S21	CONVeh	0.284928	0.1679	1.69701
S22	CONVeh	0.157574		0.938499
S23	CONVeh	0.128399		0.764733
S24	CONVeh	0.252096		1.50146
S25	CONVeh	0.107453		0.639983
S27	CONVeh	0.173016		1.03047
S29	CONVeh	0.0718349		0.427843
S01	CONPhe	0.0132404		0.078859
S02	CONPhe	0.529116		3.15137
S03	CONPhe	0.00051003		0.0030377
S05	CONPhe	0.0571449		0.34035
S07	CONPhe	0.148616		0.885143
S08	CONPhe	0.00267484		0.0159312
S09	CONPhe	0.0440203		0.262181
S10	CONPhe	0.0348464		0.207542
S12	CONPro	0.00388096		0.0231147
S13	CONPro	0.0900119		0.536104
S14	CONPro	0.451035		2.68633
S16	CONPro	0.0041233		0.024558
S17	CONPro	0.0300959		0.179249
S18	CONPro	0.196035		1.16757
S51	CSFVeh	0.257152		1.53158
S52	CSFVeh	0.412894		2.45916
S53	CSFVeh	0.964297		5.74327
S54	CSFVeh	0.275124		1.63862
S56	CSFVeh	1.16753		6.95373
S58	CSFVeh	1.08529		6.46388
S59	CSFVeh	0.552035		3.28787
S60	CSFVeh	0.838355		4.99318
S31	CSFPhe	0.842738		5.01928
S32	CSFPhe	0.629408		3.7487
S34	CSFPhe	0.297359		1.77105
S35	CSFPhe	0.687997		4.09766
S36	CSFPhe	0.311062		1.85266
S37	CSFPhe	0.810716		4.82856
S38	CSFPhe	0.236808		1.41041
S40	CSFPhe	0.228772		1.36255
S42	CSFPro	0.155075		0.923615
S44	CSFPro	0.0645367		0.384375
S45	CSFPro	0.164735		0.981148
S46	CSFPro	0.173866		1.03553
S48	CSFPro	0.17302		1.03049
S49	CSFPro	0.178512		1.0632
