# Supplementary material for: Alpha- and beta- adrenergic receptors regulate inflammatory responses to acute and chronic sleep fragmentation in mice
Source: PeerJ. 2021 Jun 24;9:e11616. doi: 10.7717/peerj.11616 (PMC8236227; doi:10.7717/peerj.11616)
Supplement: Supplemental Information 5 — Each data point indicates the mRNA expression level of the target gene. [file peerj-09-11616-s005.xlsx]

## Sheet: CSF_TNFa_Fat
Sample Name	Treatment	Relative Expression	CONVeh Average	Fold Change
F21	CONVeh	0.0155963	0.00861446	1.81048
F22	CONVeh	0.00733795		0.851818
F23	CONVeh	0.00383585		0.445281
F24	CONVeh	0.00505998		0.587382
F25	CONVeh	0.00351294		0.407796
F26	CONVeh	0.00264271		0.306776
F27	CONVeh	0.00773234		0.8976
F28	CONVeh	0.0130126		1.51056
F29	CONVeh	0.0115164		1.33686
F30	CONVeh	0.0158975		1.84545
F01	CONPhe	0.00580839		0.674261
F02	CONPhe	0.00850417		0.987197
F03	CONPhe	0.00692896		0.804341
F04	CONPhe	0.00325867		0.378279
F05	CONPhe	0.00695731		0.807632
F06	CONPhe	0.00739582		0.858536
F07	CONPhe	0.00624506		0.724951
F09	CONPhe	0.00678205		0.787287
F10	CONPhe	0.00686387		0.796784
F12	CONPro	0.00656281		0.761836
F13	CONPro	0.00565985		0.657017
F14	CONPro	0.00772828		0.897128
F15	CONPro	0.00327636		0.380332
F16	CONPro	0.0058815		0.682747
F17	CONPro	0.0116044		1.34708
F18	CONPro	0.0111065		1.28929
F19	CONPro	0.0135503		1.57298
F20	CONPro	0.0155963		1.81048
F51	CSFVeh	0.0205475		2.38524
F52	CSFVeh	0.0181761		2.10995
F53	CSFVeh	0.0233287		2.70809
F54	CSFVeh	0.0397641		4.61597
F55	CSFVeh	0.0452537		5.25323
F56	CSFVeh	0.0446329		5.18116
F58	CSFVeh	0.0956921		11.1083
F59	CSFVeh	0.0394321		4.57743
F31	CSFPhe	0.00791306		0.918579
F32	CSFPhe	0.0304455		3.53424
F33	CSFPhe	0.02474		2.87192
F34	CSFPhe	0.00750936		0.871716
F36	CSFPhe	0.0174094		2.02095
F38	CSFPhe	0.0322653		3.74548
F39	CSFPhe	0.0379506		4.40545
F40	CSFPhe	0.0456095		5.29452
F41	CSFPro	0.0670746		7.78628
F42	CSFPro	0.0626515		7.27283
F43	CSFPro	0.0420548		4.88188
F44	CSFPro	0.0390282		4.53055
F45	CSFPro	0.0248571		2.88551
F46	CSFPro	0.0443722		5.1509
F48	CSFPro	0.025811		2.99624
F49	CSFPro	0.0542264		6.29481
F50	CSFPro	0.0209663		2.43385

## Sheet: CSF_TNFa_Heart
Sample Name	Treatment	Relative Expression	CONVeh Average	Fold Change
H21	CONVeh	0.0162503	0.0114952	1.41367
H22	CONVeh	0.0119062		1.03576
H24	CONVeh	0.00876424		0.762429
H27	CONVeh	0.0117982		1.02636
H28	CONVeh	0.00875844		0.761925
H29	CONVeh	0.0109062		0.948767
H30	CONVeh	0.0120824		1.05109
H03	CONPhe	0.00803126		0.698665
H04	CONPhe	0.00393706		0.342497
H05	CONPhe	0.0038518		0.335081
H06	CONPhe	0.00654945		0.569758
H08	CONPhe	0.00419921		0.365303
H09	CONPhe	0.00646698		0.562583
H10	CONPhe	0.00704457		0.61283
H11	CONPro	0.011827		1.02887
H13	CONPro	0.0148315		1.29024
H14	CONPro	0.00886348		0.771062
H17	CONPro	0.0152471		1.3264
H18	CONPro	0.0137949		1.20006
H19	CONPro	0.0155658		1.35412
H20	CONPro	0.0136172		1.1846
H52	CSFVeh	0.0101989		0.887231
H53	CSFVeh	0.0212665		1.85004
H54	CSFVeh	0.0226604		1.9713
H56	CSFVeh	0.0136693		1.18914
H57	CSFVeh	0.0280519		2.44033
H59	CSFVeh	0.0249379		2.16943
H60	CSFVeh	0.0367909		3.20056
H31	CSFPhe	0.0144074		1.25335
H32	CSFPhe	0.0143574		1.249
H33	CSFPhe	0.0263465		2.29197
H34	CSFPhe	0.0165125		1.43647
H35	CSFPhe	0.012613		1.09724
H36	CSFPhe	0.0146782		1.27691
H38	CSFPhe	0.0098886		0.860241
H39	CSFPhe	0.00501597		0.436355
H40	CSFPhe	0.00869161		0.756111
H41	CSFPro	0.0146622		1.27551
H43	CSFPro	0.028642		2.49166
H44	CSFPro	0.0188415		1.63908
H45	CSFPro	0.0161254		1.4028
H47	CSFPro	0.026775		2.32925
H48	CSFPro	0.0137787		1.19866
H49	CSFPro	0.0084641		0.736319
H50	CSFPro	0.0258692		2.25044

## Sheet: CSF_TNFa_Liver
Sample Name	Treatment	Relative Expression	CONVeh Average	Fold Change
L23	CONVeh	0.221062	0.383037	0.577129
L24	CONVeh	0.45697		1.19302
L25	CONVeh	0.0714258		0.186472
L26	CONVeh	0.669235		1.74718
L27	CONVeh	0.179973		0.469857
L29	CONVeh	0.389638		1.01723
L30	CONVeh	0.692958		1.80911
L01	CONPhe	0.0425115		0.110985
L02	CONPhe	0.347972		0.908454
L03	CONPhe	0.274724		0.717224
L04	CONPhe	0.292628		0.763967
L05	CONPhe	0.383771		1.00192
L07	CONPhe	0.117945		0.30792
L08	CONPhe	0.121735		0.317816
L11	CONPro	0.0984204		0.256947
L12	CONPro	0.115457		0.301425
L13	CONPro	0.104975		0.27406
L14	CONPro	0.188855		0.493047
L15	CONPro	0.167057		0.436138
L16	CONPro	0.0424713		0.11088
L17	CONPro	0.0834844		0.217954
L20	CONPro	0.24978		0.652104
L51	CSFVeh	0.0991642		0.258889
L52	CSFVeh	0.0778052		0.203127
L53	CSFVeh	0.151027		0.394287
L54	CSFVeh	0.136885		0.357368
L55	CSFVeh	0.0344362		0.089903
L56	CSFVeh	0.0569068		0.148567
L57	CSFVeh	1.60122		4.18032
L58	CSFVeh	1.17611		3.07048
L59	CSFVeh	0.201568		0.526235
L60	CSFVeh	1.12203		2.9293
L31	CSFPhe	0.470831		1.2292
L32	CSFPhe	0.18637		0.486559
L33	CSFPhe	0.0805079		0.210183
L34	CSFPhe	0.512291		1.33744
L36	CSFPhe	0.544732		1.42214
L37	CSFPhe	0.443975		1.15909
L38	CSFPhe	0.0522713		0.136465
L39	CSFPhe	0.433139		1.1308
L40	CSFPhe	0.0545189		0.142333
L41	CSFPro	0.28173		0.735517
L42	CSFPro	0.280245		0.731638
L43	CSFPro	0.1979		0.516661
L44	CSFPro	0.371777		0.970602
L46	CSFPro	0.0854998		0.223215
L47	CSFPro	0.0734486		0.191753
L50	CSFPro	0.0996921		0.260267

## Sheet: CSF_TNFa_Spleen
Sample Name	Treatment	Relative Expression	CONVeh Average	Fold Change
S21	CONVeh	0.171439	0.182882	0.937428
S22	CONVeh	0.123054		0.672861
S23	CONVeh	0.269154		1.47173
S24	CONVeh	0.227532		1.24415
S25	CONVeh	0.079465		0.434515
S26	CONVeh	0.232796		1.27293
S27	CONVeh	0.083233		0.455119
S28	CONVeh	0.276383		1.51126
S01	CONPhe	0.168279		0.920152
S02	CONPhe	0.270244		1.47769
S03	CONPhe	0.0378074		0.206731
S04	CONPhe	0.151154		0.826509
S05	CONPhe	0.12698		0.694328
S07	CONPhe	0.324061		1.77197
S08	CONPhe	0.0267084		0.146042
S09	CONPhe	0.20139		1.1012
S12	CONPro	0.0509857		0.27879
S14	CONPro	0.155476		0.850146
S15	CONPro	0.552264		3.01978
S16	CONPro	0.183739		1.00469
S17	CONPro	0.506616		2.77018
S18	CONPro	1.15492		6.31511
S19	CONPro	2.93156		16.0298
S20	CONPro	0.38208		2.08922
S52	CSFVeh	9.3328		51.0318
S53	CSFVeh	6.74979		36.9079
S54	CSFVeh	7.76666		42.4681
S56	CSFVeh	14.6261		79.9757
S58	CSFVeh	5.6104		30.6777
S59	CSFVeh	5.28743		28.9117
S60	CSFVeh	4.8284		26.4017
S34	CSFPhe	1.22732		6.71097
S35	CSFPhe	2.80426		15.3337
S36	CSFPhe	1.18234		6.46505
S37	CSFPhe	6.34477		34.6933
S38	CSFPhe	1.85863		10.163
S39	CSFPhe	1.07244		5.86408
S40	CSFPhe	1.06419		5.81899
S44	CSFPro	0.595327		3.25525
S45	CSFPro	2.30881		12.6246
S46	CSFPro	6.09894		33.349
S47	CSFPro	3.17609		17.3669
S48	CSFPro	1.78383		9.75401
S49	CSFPro	2.40684		13.1606

## Sheet: CSF_TNFa_PrefrontalCortex
Sample Name	Treatment	Relative Expression	CONVeh Average	Fold Change
FC21	CONVeh	1.8199e-07	2.1646e-06	0.0840754
FC22	CONVeh	6.75437e-07		0.312037
FC23	CONVeh	9.50889e-07		0.43929
FC24	CONVeh	7.31121e-06		3.37762
FC25	CONVeh	4.97772e-07		0.22996
FC26	CONVeh	1.35353e-06		0.625301
FC27	CONVeh	9.42905e-07		0.435602
FC28	CONVeh	6.05539e-06		2.79746
FC29	CONVeh	3.18212e-06		1.47007
FC30	CONVeh	4.94796e-07		0.228585
FC01	CONPhe	4.29776e-07		0.198547
FC02	CONPhe	2.21772e-06		1.02454
FC03	CONPhe	1.75817e-06		0.812236
FC04	CONPhe	2.38037e-06		1.09968
FC05	CONPhe	8.50002e-07		0.392682
FC06	CONPhe	3.2001e-06		1.47838
FC07	CONPhe	2.52846e-07		0.116809
FC08	CONPhe	5.47653e-07		0.253004
FC09	CONPhe	2.5893e-06		1.1962
FC10	CONPhe	1.00309e-06		0.463406
FC11	CONPro	5.40564e-06		2.49729
FC13	CONPro	1.96886e-06		0.909571
FC14	CONPro	2.23629e-06		1.03312
FC15	CONPro	2.6734e-06		1.23505
FC16	CONPro	5.1218e-06		2.36616
FC17	CONPro	1.14359e-06		0.528314
FC18	CONPro	7.64477e-06		3.53172
FC19	CONPro	4.90266e-06		2.26492
FC20	CONPro	1.13716e-06		0.525343
FC52	CSFVeh	2.15741e-06		0.996677
FC53	CSFVeh	1.0888e-05		5.03002
FC54	CSFVeh	1.85467e-06		0.856817
FC55	CSFVeh	1.86139e-05		8.59922
FC56	CSFVeh	1.20712e-05		5.57663
FC57	CSFVeh	0.000155209		71.7032
FC58	CSFVeh	8.55197e-05		39.5082
FC59	CSFVeh	0.000183634		84.8349
FC60	CSFVeh	0.000125004		57.7491
FC31	CSFPhe	1.66376e-06		0.768621
FC32	CSFPhe	4.82142e-06		2.22739
FC33	CSFPhe	3.26968e-06		1.51052
FC34	CSFPhe	2.04152e-06		0.943138
FC36	CSFPhe	1.95493e-06		0.903135
FC37	CSFPhe	5.23312e-06		2.41759
FC38	CSFPhe	1.93478e-05		8.93826
FC39	CSFPhe	1.22692e-06		0.56681
FC40	CSFPhe	3.69852e-06		1.70864
FC42	CSFPro	2.76012e-06		1.27512
FC44	CSFPro	4.12749e-05		19.0681
FC45	CSFPro	2.5679e-05		11.8631
FC46	CSFPro	2.91622e-05		13.4723
FC47	CSFPro	4.75958e-05		21.9882
FC48	CSFPro	3.6886e-05		17.0405
FC50	CSFPro	1.32313e-05		6.11257

## Sheet: CSF_TNFa_Hippocampus
Sample Name	Treatment	Relative Expression	CONVeh Average	Fold Change
HIP21	CONVeh	1.68314e-07	1.97158e-06	0.0853702
HIP23	CONVeh	1.02921e-06		0.522024
HIP24	CONVeh	4.3527e-06		2.20772
HIP25	CONVeh	3.94145e-07		0.199914
HIP26	CONVeh	1.2448e-06		0.631373
HIP27	CONVeh	9.61176e-07		0.487516
HIP28	CONVeh	6.00164e-06		3.04408
HIP29	CONVeh	3.05919e-06		1.55165
HIP30	CONVeh	5.33019e-07		0.270352
HIP01	CONPhe	4.5547e-07		0.231018
HIP02	CONPhe	2.54671e-06		1.29171
HIP03	CONPhe	2.18792e-06		1.10973
HIP04	CONPhe	2.86286e-06		1.45207
HIP05	CONPhe	8.91189e-07		0.452018
HIP06	CONPhe	3.32823e-06		1.68811
HIP07	CONPhe	2.49742e-07		0.126671
HIP08	CONPhe	6.15683e-07		0.312279
HIP09	CONPhe	2.47654e-06		1.25612
HIP10	CONPhe	1.06529e-06		0.540324
HIP11	CONPro	5.80973e-06		2.94674
HIP13	CONPro	2.17746e-06		1.10443
HIP14	CONPro	2.14077e-06		1.08582
HIP15	CONPro	2.59286e-06		1.31512
HIP16	CONPro	5.65207e-06		2.86678
HIP17	CONPro	1.14093e-06		0.578689
HIP18	CONPro	6.0994e-06		3.09367
HIP19	CONPro	5.48572e-06		2.7824
HIP20	CONPro	1.23814e-06		0.627995
HIP51	CSFVeh	3.06859e-06		1.55641
HIP52	CSFVeh	8.75355e-06		4.43987
HIP53	CSFVeh	3.80747e-05		19.3118
HIP54	CSFVeh	7.95201e-06		4.03332
HIP56	CSFVeh	4.04226e-05		20.5027
HIP57	CSFVeh	0.000395174		200.435
HIP58	CSFVeh	0.000235325		119.359
HIP59	CSFVeh	0.000455192		230.877
HIP60	CSFVeh	0.00033226		168.525
HIP31	CSFPhe	1.69425e-06		0.859337
HIP32	CSFPhe	4.58544e-06		2.32577
HIP33	CSFPhe	2.94434e-06		1.49339
HIP34	CSFPhe	1.83556e-06		0.931011
HIP35	CSFPhe	3.92278e-07		0.198967
HIP36	CSFPhe	2.13062e-06		1.08067
HIP37	CSFPhe	4.27109e-06		2.16633
HIP38	CSFPhe	1.21066e-05		6.14057
HIP39	CSFPhe	1.14981e-06		0.583193
HIP40	CSFPhe	3.64631e-06		1.84944
HIP42	CSFPro	2.77269e-06		1.40633
HIP43	CSFPro	7.90154e-05		40.0773
HIP44	CSFPro	0.000141294		71.6655
HIP46	CSFPro	8.57706e-05		43.5035
HIP47	CSFPro	0.000132665		67.2888
HIP48	CSFPro	0.000101425		51.4436
HIP49	CSFPro	0.000322072		163.358
HIP50	CSFPro	4.33618e-05		21.9935

## Sheet: CSF_TNFa_Hypothalamus
Sample Name	Treatment	Relative Expression	CONVeh Average	Fold Change
HYP52	CONVeh	3.13828e-05	8.46396e-06	3.70782
HYP53	CONVeh	8.59408e-06		1.01537
HYP54	CONVeh	2.18644e-06		0.258324
HYP55	CONVeh	4.36742e-06		0.516002
HYP56	CONVeh	2.4414e-06		0.288447
HYP57	CONVeh	6.16826e-06		0.728768
HYP58	CONVeh	4.0017e-06		0.472793
HYP59	CONVeh	1.06607e-05		1.25954
HYP60	CONVeh	6.37284e-06		0.752938
HYP31	CONPhe	3.12202e-05		3.6886
HYP32	CONPhe	1.51068e-05		1.78484
HYP33	CONPhe	1.88016e-05		2.22137
HYP34	CONPhe	3.25124e-05		3.84128
HYP35	CONPhe	1.11161e-05		1.31335
HYP36	CONPhe	3.34852e-05		3.95621
HYP37	CONPhe	2.29866e-05		2.71582
HYP38	CONPhe	2.4757e-05		2.92499
HYP39	CONPhe	3.19883e-05		3.77935
HYP40	CONPhe	1.47852e-05		1.74684
HYP42	CONPro	3.70587e-05		4.37841
HYP43	CONPro	5.51418e-05		6.51489
HYP44	CONPro	2.58805e-05		3.05773
HYP45	CONPro	5.73257e-05		6.77292
HYP46	CONPro	6.18808e-05		7.31109
HYP47	CONPro	5.07888e-05		6.0006
HYP48	CONPro	3.00275e-05		3.54769
HYP49	CONPro	5.54968e-06		0.655684
HYP50	CONPro	3.9445e-05		4.66035
HYP21	CSFVeh	1.70684e-05		2.0166
HYP22	CSFVeh	1.7933e-05		2.11875
HYP23	CSFVeh	2.61832e-05		3.09349
HYP24	CSFVeh	6.62904e-06		0.783208
HYP25	CSFVeh	1.46877e-05		1.73532
HYP26	CSFVeh	1.50691e-05		1.78038
HYP27	CSFVeh	2.19762e-05		2.59644
HYP28	CSFVeh	3.77083e-05		4.45516
HYP29	CSFVeh	5.66682e-05		6.69523
HYP30	CSFVeh	1.61261e-05		1.90527
HYP01	CSFPhe	7.58567e-05		8.96232
HYP02	CSFPhe	8.68917e-05		10.2661
HYP03	CSFPhe	4.17523e-05		4.93295
HYP04	CSFPhe	8.69515e-05		10.2731
HYP05	CSFPhe	4.37055e-05		5.16372
HYP06	CSFPhe	2.8766e-05		3.39865
HYP07	CSFPhe	1.04668e-05		1.23663
HYP08	CSFPhe	2.38471e-05		2.81749
HYP09	CSFPhe	2.17273e-05		2.56704
HYP10	CSFPhe	6.32284e-06		0.747031
HYP11	CSFPro	4.22531e-05		4.99212
HYP12	CSFPro	7.14951e-05		8.447
HYP13	CSFPro	8.62807e-05		10.1939
HYP14	CSFPro	4.65511e-05		5.49992
HYP15	CSFPro	0.000165242		19.523
HYP16	CSFPro	8.93744e-06		1.05594
HYP17	CSFPro	1.40145e-05		1.65579
HYP18	CSFPro	4.14724e-05		4.89988
HYP19	CSFPro	2.48723e-05		2.93861
HYP20	CSFPro	8.31403e-05		9.82286
