# Supplementary material for: Alpha- and beta- adrenergic receptors regulate inflammatory responses to acute and chronic sleep fragmentation in mice
Source: PeerJ. 2021 Jun 24;9:e11616. doi: 10.7717/peerj.11616 (PMC8236227; doi:10.7717/peerj.11616)
Supplement: Supplemental Information 6 — Each data point indicates the mRNA expression level of the target gene. [file peerj-09-11616-s006.xlsx]

## Sheet: CSF_TGFB_Fat
Sample Name	Treatment	Relative Expression	CONVeh Average	Fold Change
F21	CONVeh	0.545601	1.15324	0.473103
F22	CONVeh	0.757238		0.656618
F23	CONVeh	0.752108		0.65217
F24	CONVeh	0.610501		0.529379
F25	CONVeh	0.662269		0.574268
F27	CONVeh	1.70575		1.47909
F28	CONVeh	2.00179		1.73579
F29	CONVeh	2.19067		1.89957
F05	CONPhe	2.06135		1.78744
F06	CONPhe	2.075		1.79928
F07	CONPhe	0.499982		0.433545
F08	CONPhe	3.31242		2.87227
F09	CONPhe	4.28084		3.71201
F10	CONPhe	7.18313		6.22865
F12	CONPro	0.787074		0.682489
F13	CONPro	0.219176		0.190053
F14	CONPro	0.941959		0.816793
F15	CONPro	1.16078		1.00654
F17	CONPro	1.79095		1.55297
F18	CONPro	1.44091		1.24945
F20	CONPro	0.00302211		0.00262054
F51	CSFVeh	11.5777		10.0393
F52	CSFVeh	5.27058		4.57024
F55	CSFVeh	10.01		8.67993
F56	CSFVeh	18.776		16.2811
F57	CSFVeh	31.5474		27.3555
F58	CSFVeh	13.048		11.3142
F59	CSFVeh	5.74072		4.9779
F31	CSFPhe	1.65072		1.43138
F34	CSFPhe	0.892429		0.773845
F35	CSFPhe	6.39145		5.54217
F36	CSFPhe	4.79116		4.15452
F37	CSFPhe	3.55258		3.08052
F40	CSFPhe	19.271		16.7103
F41	CSFPro	7.60857		6.59755
F42	CSFPro	28.131		24.393
F43	CSFPro	9.88659		8.57287
F44	CSFPro	18.7274		16.2389
F45	CSFPro	27.2581		23.6361
F46	CSFPro	12.3888		10.7426
F47	CSFPro	28.9464		25.1001
F48	CSFPro	10.5705		9.16588
F49	CSFPro	26.9778		23.393
F50	CSFPro	7.99084		6.92903

## Sheet: CSF_TGFB_Heart
Sample Name	Treatment	Relative Expression	CONVeh Average	Fold Change
H30	CONVeh	48.9007	37.37	1.30856
H29	CONVeh	62.5931		1.67496
H28	CONVeh	72.1653		1.9311
H27	CONVeh	60.6315		1.62247
H25	CONVeh	15.8314		0.423639
H24	CONVeh	12.9513		0.346571
H23	CONVeh	18.5678		0.496864
H22	CONVeh	20.2727		0.542487
H21	CONVeh	24.4158		0.653353
H10	CONPhe	66.0402		1.7672
H09	CONPhe	35.5366		0.950941
H08	CONPhe	81.1381		2.17121
H07	CONPhe	64.1379		1.7163
H06	CONPhe	61.4766		1.64508
H05	CONPhe	31.3751		0.83958
H04	CONPhe	36.5932		0.979215
H03	CONPhe	41.0149		1.09754
H02	CONPhe	43.4221		1.16195
H20	CONPro	43.626		1.16741
H19	CONPro	25.1068		0.671844
H18	CONPro	28.1632		0.753632
H17	CONPro	59.2256		1.58485
H16	CONPro	48.3526		1.29389
H15	CONPro	86.726		2.32074
H14	CONPro	133.177		3.56375
H13	CONPro	42.3373		1.13292
H12	CONPro	59.2763		1.5862
H11	CONPro	37.5889		1.00586
H60	CSFVeh	43.9978		1.17736
H59	CSFVeh	473.488		12.6703
H58	CSFVeh	527.444		14.1141
H56	CSFVeh	1157.32		30.9692
H55	CSFVeh	564.282		15.0999
H53	CSFVeh	342.971		9.17773
H52	CSFVeh	170.091		4.55154
H51	CSFVeh	457.824		12.2511
H38	CSFPhe	281.044		7.52058
H37	CSFPhe	94.3113		2.52372
H36	CSFPhe	155.614		4.16414
H35	CSFPhe	184.705		4.94261
H34	CSFPhe	18.4773		0.494442
H33	CSFPhe	126.377		3.38179
H31	CSFPhe	38.625		1.03358
H50	CSFPro	328.403		8.78789
H49	CSFPro	1259.1		33.6929
H48	CSFPro	490.417		13.1233
H47	CSFPro	869.688		23.2724
H46	CSFPro	396.88		10.6203
H45	CSFPro	869.914		23.2784
H44	CSFPro	648.268		17.3473
H43	CSFPro	199.935		5.35015
H42	CSFPro	934.434		25.005
H41	CSFPro	175.889		4.70671

## Sheet: CSF_TGFB_Liver
Sample Name	Treatment	Relative Expression	CONVeh Average	Fold Change
L51	CONVeh	2170000	25259500	0.0859083
L52	CONVeh	1030000		0.0407767
L53	CONVeh	945000		0.0374117
L54	CONVeh	1630000		0.0645302
L55	CONVeh	1860000		0.0736357
L56	CONVeh	1590000		0.0629466
L57	CONVeh	220000000		8.70959
L58	CONVeh	2930000		0.115996
L59	CONVeh	3340000		0.132227
L60	CONVeh	17100000		0.676973
L31	CONPhe	28300000000		1120.37
L32	CONPhe	5550000000		219.719
L33	CONPhe	1100000000		43.548
L34	CONPhe	439000000000		17379.6
L36	CONPhe	114000000		4.51315
L37	CONPhe	24900000		0.985768
L38	CONPhe	41600		0.00164691
L39	CONPhe	13100000		0.518617
L40	CONPhe	3130000		0.123914
L41	CONPro	2910000		0.115204
L42	CONPro	7490000		0.296522
L43	CONPro	13000000		0.514658
L44	CONPro	1220000		0.0482987
L45	CONPro	28300000000		1120.37
L46	CONPro	1560000		0.0617589
L47	CONPro	1250000		0.0494863
L48	CONPro	37800000		1.49647
L49	CONPro	36200000		1.43312
L50	CONPro	4550000		0.18013
L21	CSFVeh	9370000000000		370950
L22	CSFVeh	84200000000		3333.4
L23	CSFVeh	2910000000		115.204
L24	CSFVeh	10300000000		407.767
L25	CSFVeh	42900000		1.69837
L26	CSFVeh	2730000000		108.078
L27	CSFVeh	45000000000		1781.51
L28	CSFVeh	195000000000		7719.87
L29	CSFVeh	37800000000		1496.47
L30	CSFVeh	44100000000		1745.88
L04	CSFPhe	296000000000		11718.4
L06	CSFPhe	745000000		29.4939
L07	CSFPhe	2500000000000		98972.7
L08	CSFPhe	1410000000000		55820.6
L09	CSFPhe	162000000000		6413.43
L10	CSFPhe	1470000000000		58195.9
L11	CSFPro	70500000		2.79103
L12	CSFPro	34100000000		1349.99
L13	CSFPro	3640000000000		144104
L14	CSFPro	12400000000		490.904
L15	CSFPro	4770000000000		188840
L16	CSFPro	30400000000		1203.51
L17	CSFPro	18200000000		720.521
L18	CSFPro	4450000000		176.171
L19	CSFPro	421000000000		16667
L20	CSFPro	640000000000		25337

## Sheet: CSF_TGFB_Spleen
Sample Name	Treatment	Relative Expression	CONVeh Average	Fold Change
S21	CONVeh	15.1249	13.4124	1.12769
S22	CONVeh	3.06008		0.228154
S23	CONVeh	7.39741		0.551537
S24	CONVeh	21.4064		1.59602
S25	CONVeh	2.91145		0.217072
S26	CONVeh	23.3063		1.73767
S27	CONVeh	18.3323		1.36682
S28	CONVeh	15.76		1.17503
S01	CONPhe	11.2712		0.84036
S02	CONPhe	9.54765		0.711855
S03	CONPhe	5.08489		0.37912
S04	CONPhe	3.54027		0.263956
S05	CONPhe	2.09514		0.15621
S07	CONPhe	3.24001		0.241569
S08	CONPhe	5.81003		0.433185
S09	CONPhe	8.87436		0.661656
S10	CONPhe	11.8499		0.883508
S11	CONPro	1.71193		0.127638
S12	CONPro	3.86554		0.288207
S14	CONPro	1.21249		0.0904012
S15	CONPro	5.35624		0.399351
S16	CONPro	9.70989		0.723951
S17	CONPro	18.8324		1.40411
S18	CONPro	36.8195		2.74519
S51	CSFVeh	20.2161		1.50727
S52	CSFVeh	107.313		8.00103
S53	CSFVeh	104.629		7.80096
S54	CSFVeh	22.0635		1.64502
S55	CSFVeh	10.3737		0.773442
S56	CSFVeh	49.0634		3.65807
S57	CSFVeh	15.6694		1.16828
S58	CSFVeh	38.3984		2.86291
S59	CSFVeh	14.6326		1.09098
S60	CSFVeh	35.5734		2.65229
S31	CSFPhe	53.0285		3.9537
S32	CSFPhe	56.8666		4.23987
S34	CSFPhe	18.6664		1.39173
S35	CSFPhe	33.2639		2.48009
S36	CSFPhe	36.7243		2.7381
S37	CSFPhe	62.8172		4.68353
S38	CSFPhe	22.3785		1.6685
S39	CSFPhe	26.957		2.00986
S40	CSFPhe	34.1514		2.54626
S44	CSFPro	31.4554		2.34526
S45	CSFPro	52.3516		3.90324
S46	CSFPro	24.1266		1.79883
S47	CSFPro	20.877		1.55655
S48	CSFPro	16.5435		1.23345
S49	CSFPro	28.0444		2.09094

## Sheet: CSF_TGFB_PrefrontalCortex
Sample Name	Treatment	Relative Expression	CONVeh Average	Fold Change
FC21	CONVeh	0.37929	0.721991	0.525338
FC22	CONVeh	0.618238		0.856296
FC25	CONVeh	1.37019		1.89779
FC26	CONVeh	0.947853		1.31283
FC27	CONVeh	0.560381		0.776161
FC28	CONVeh	0.559836		0.775405
FC29	CONVeh	0.885523		1.2265
FC30	CONVeh	0.454622		0.629678
FC01	CONPhe	0.786384		1.08919
FC02	CONPhe	0.417166		0.577799
FC03	CONPhe	0.552831		0.765703
FC04	CONPhe	0.335455		0.464625
FC05	CONPhe	0.634139		0.87832
FC06	CONPhe	1.16842		1.61833
FC07	CONPhe	0.422093		0.584623
FC08	CONPhe	0.283925		0.393253
FC09	CONPhe	0.622342		0.861979
FC10	CONPhe	0.49271		0.682432
FC11	CONPro	1.41941		1.96597
FC13	CONPro	0.604377		0.837098
FC14	CONPro	0.487312		0.674956
FC15	CONPro	0.620202		0.859016
FC16	CONPro	0.744319		1.03093
FC17	CONPro	1.14493		1.58579
FC18	CONPro	2.04834		2.83707
FC19	CONPro	0.92051		1.27496
FC20	CONPro	0.73868		1.02312
FC51	CSFVeh	6.48449		8.98139
FC52	CSFVeh	5.33091		7.38362
FC53	CSFVeh	4.49854		6.23074
FC55	CSFVeh	4.02217		5.57094
FC56	CSFVeh	15.3671		21.2843
FC57	CSFVeh	22.9216		31.7478
FC59	CSFVeh	30.7353		42.5702
FC60	CSFVeh	27.9972		38.7777
FC31	CSFPhe	1.03088		1.42783
FC32	CSFPhe	1.06339		1.47285
FC33	CSFPhe	1.28613		1.78137
FC34	CSFPhe	1.09164		1.51198
FC35	CSFPhe	0.684614		0.94823
FC36	CSFPhe	1.08273		1.49964
FC37	CSFPhe	1.24914		1.73013
FC39	CSFPhe	0.434308		0.601542
FC40	CSFPhe	0.817916		1.13286
FC41	CSFPro	0.569051		0.788169
FC42	CSFPro	0.914705		1.26692
FC46	CSFPro	7.65825		10.6071
FC48	CSFPro	9.57081		13.2561
FC49	CSFPro	13.9534		19.3263
FC50	CSFPro	11.2235		15.5452

## Sheet: CSF_TGFB_Hippocampus
Sample Name	Treatment	Relative Expression	CONVeh Average	Fold Change
HIP21	CONVeh	0.174411	0.333125	0.523561
HIP22	CONVeh	0.28855		0.86619
HIP23	CONVeh	0.260516		0.782037
HIP24	CONVeh	0.164113		0.492647
HIP25	CONVeh	0.243228		0.730141
HIP26	CONVeh	0.260563		0.782179
HIP27	CONVeh	0.736032		2.20948
HIP28	CONVeh	0.405774		1.21808
HIP29	CONVeh	0.401794		1.20613
HIP30	CONVeh	0.39627		1.18955
HIP01	CONPhe	0.588669		1.76711
HIP02	CONPhe	0.237467		0.712845
HIP03	CONPhe	0.244854		0.735021
HIP04	CONPhe	0.21223		0.637089
HIP06	CONPhe	0.147164		0.441767
HIP10	CONPhe	0.184442		0.553671
HIP11	CONPro	0.208761		0.626673
HIP13	CONPro	0.197874		0.593992
HIP14	CONPro	0.218799		0.656808
HIP15	CONPro	0.195542		0.586991
HIP16	CONPro	0.250755		0.752735
HIP17	CONPro	0.21443		0.643692
HIP18	CONPro	0.489058		1.46809
HIP20	CONPro	0.228438		0.685743
HIP51	CSFVeh	0.542056		1.62718
HIP52	CSFVeh	1.78694		5.36416
HIP53	CSFVeh	2.11714		6.35538
HIP54	CSFVeh	0.647294		1.9431
HIP55	CSFVeh	0.465972		1.39879
HIP57	CSFVeh	0.488644		1.46685
HIP58	CSFVeh	1.65613		4.9715
HIP59	CSFVeh	0.69609		2.08957
HIP60	CSFVeh	0.838802		2.51798
HIP32	CSFPhe	0.507463		1.52334
HIP34	CSFPhe	0.43946		1.3192
HIP35	CSFPhe	0.509703		1.53006
HIP36	CSFPhe	0.598097		1.79541
HIP37	CSFPhe	0.54244		1.62834
HIP38	CSFPhe	0.427947		1.28464
HIP39	CSFPhe	0.392089		1.177
HIP40	CSFPhe	0.486071		1.45913
HIP41	CSFPro	1.2821		3.84872
HIP42	CSFPro	0.443894		1.33251
HIP46	CSFPro	1.44246		4.33009
HIP48	CSFPro	0.601588		1.80589
HIP49	CSFPro	0.662235		1.98795
HIP50	CSFPro	0.841196		2.52517

## Sheet: CSF_TGFB_Hypothalamus
Sample Name	Treatment	Relative Expression	CONVeh Average	Fold Change
HYP21	CONVeh	0.438846	0.338419	1.29675
HYP22	CONVeh	0.326886		0.965921
HYP23	CONVeh	0.336067		0.993051
HYP24	CONVeh	0.275689		0.814638
HYP25	CONVeh	0.251352		0.742725
HYP26	CONVeh	0.278559		0.823119
HYP27	CONVeh	0.400693		1.18401
HYP28	CONVeh	0.384365		1.13577
HYP29	CONVeh	0.400618		1.18379
HYP30	CONVeh	0.291112		0.860214
HYP01	CONPhe	0.534193		1.5785
HYP02	CONPhe	0.346504		1.02389
HYP03	CONPhe	0.341223		1.00829
HYP04	CONPhe	0.434653		1.28437
HYP05	CONPhe	0.321544		0.950136
HYP06	CONPhe	0.316937		0.936523
HYP07	CONPhe	0.266985		0.788919
HYP08	CONPhe	0.230462		0.680996
HYP09	CONPhe	0.246259		0.727676
HYP10	CONPhe	0.270345		0.798846
HYP11	CONPro	0.282254		0.834037
HYP12	CONPro	1.16931		3.45523
HYP13	CONPro	0.216056		0.638428
HYP14	CONPro	0.271918		0.803495
HYP15	CONPro	1.01932		3.01199
HYP16	CONPro	0.306983		0.907112
HYP17	CONPro	0.340517		1.0062
HYP18	CONPro	0.652161		1.92708
HYP19	CONPro	0.399016		1.17906
HYP20	CONPro	0.541644		1.60051
HYP51	CSFVeh	0.306217		0.904848
HYP53	CSFVeh	0.244554		0.722639
HYP54	CSFVeh	0.182207		0.538407
HYP55	CSFVeh	0.472012		1.39476
HYP56	CSFVeh	0.214465		0.633726
HYP57	CSFVeh	0.282296		0.834162
HYP58	CSFVeh	0.317631		0.938576
HYP59	CSFVeh	0.229153		0.677127
HYP60	CSFVeh	0.285361		0.843219
HYP31	CSFPhe	0.344708		1.01858
HYP32	CSFPhe	0.283195		0.836817
HYP33	CSFPhe	0.370359		1.09438
HYP34	CSFPhe	0.275094		0.81288
HYP35	CSFPhe	0.29711		0.877936
HYP37	CSFPhe	0.419925		1.24085
HYP38	CSFPhe	0.323358		0.955498
HYP39	CSFPhe	0.392073		1.15854
HYP40	CSFPhe	0.229585		0.678407
HYP42	CSFPro	0.636538		1.88092
HYP43	CSFPro	0.636767		1.8816
HYP44	CSFPro	1.21474		3.58946
HYP45	CSFPro	0.487958		1.44188
HYP46	CSFPro	0.336592		0.994604
HYP47	CSFPro	0.372837		1.1017
HYP48	CSFPro	0.301843		0.891921
HYP49	CSFPro	0.357316		1.05584
HYP50	CSFPro	0.392921		1.16105
