# Supplementary material for: Alpha- and beta- adrenergic receptors regulate inflammatory responses to acute and chronic sleep fragmentation in mice
Source: PeerJ. 2021 Jun 24;9:e11616. doi: 10.7717/peerj.11616 (PMC8236227; doi:10.7717/peerj.11616)
Supplement: Supplemental Information 7 — Each data point indicates the change in body mass (g) over the course of the chronic sleep fragmentation experiment. [file peerj-09-11616-s007.xlsx]

## Sheet: CSF Body Mass
ID	TREATMENT	WEEK	DELT_MASS
256	SF	1	-0.06
255	SF	1	-0.04
240	SF	1	-0.1
243	SF	1	0.01
247	SF	1	-0.08
254	SF	1	0
253	SF	1	-0.04
244	SF	1	-0.04
250	SF	1	-0.07
239	SF	1	-0.05
297	SF	1	-1.01
299	SF	1	-4.61
292	SF	1	-5.3
283	SF	1	-6.4
286	SF	1	-1.35
295	SF	1	14.42
291	SF	1	-1.46
256	SF	1	0
255	SF	1	0
240	SF	1	1.1
243	SF	1	1.06
247	SF	1	0.47
403	SF	1	0
409	SF	1	-4.45
418	SF	1	-4.24
416	SF	1	-3.91
400	SF	1	-1.28
428	SF	1	-1.74
426	SF	1	-3.03
427	SF	1	2.37
257	CON	1	-0.03
258	CON	1	0.01
259	CON	1	0.03
260	CON	1	-0.01
261	CON	1	-0.04
284	CON	1	0.4
282	CON	1	0
300	CON	1	0.48
301	CON	1	-0.82
293	CON	1	4.35
252	CON	1	-8.24
251	CON	1	1.26
245	CON	1	0
241	CON	1	-3.98
242	CON	1	0
414	CON	1	3.28
419	CON	1	3.45
415	CON	1	0
408	CON	1	-4.19
412	CON	1	-12.1
252	CON	1	0
251	CON	1	0
245	CON	1	0.88
241	CON	1	0.97
242	CON	1	0.54
407(429)	CON	1	0.92
406	CON	1	-2.23
410	CON	1	-2.63
411	CON	1	-1.14
413	CON	1	2.03
256	SF	2	0.02
255	SF	2	0.03
240	SF	2	0
243	SF	2	-0.01
247	SF	2	0.03
254	SF	2	0.01
253	SF	2	0.05
244	SF	2	0.04
250	SF	2	0.08
239	SF	2	0.03
297	SF	2	1.02
299	SF	2	2.9
292	SF	2	5.6
283	SF	2	4.27
286	SF	2	-0.91
295	SF	2	-12.6
291	SF	2	-0.99
256	SF	2	-4.85
255	SF	2	2.65
240	SF	2	1.67
243	SF	2	4.32
247	SF	2	0.48
403	SF	2	-2.07
409	SF	2	0.85
418	SF	2	-4.87
416	SF	2	-9.5
400	SF	2	-6.49
428	SF	2	-10.18
426	SF	2	-3.57
427	SF	2	1.39
257	CON	2	0.05
258	CON	2	0.04
259	CON	2	0.03
260	CON	2	0.05
261	CON	2	0.08
284	CON	2	0.79
282	CON	2	0
300	CON	2	1.42
301	CON	2	0
293	CON	2	0.46
252	CON	2	1.71
251	CON	2	-2.49
245	CON	2	-0.85
241	CON	2	0
242	CON	2	0
414	CON	2	0.79
419	CON	2	1.67
415	CON	2	-2.35
408	CON	2	1.46
412	CON	2	0.81
252	CON	2	-4.58
251	CON	2	2.87
245	CON	2	1.31
241	CON	2	3.85
242	CON	2	0.53
407(429)	CON	2	-0.91
406	CON	2	3.65
410	CON	2	3.6
411	CON	2	1.15
413	CON	2	-0.4
256	SF	3	0
255	SF	3	-0.02
240	SF	3	-0.01
243	SF	3	0
247	SF	3	0.06
254	SF	3	-0.02
253	SF	3	-0.05
244	SF	3	-0.05
250	SF	3	-0.01
239	SF	3	0
297	SF	3	0
299	SF	3	-0.94
292	SF	3	-1.89
283	SF	3	-1.64
286	SF	3	-0.46
295	SF	3	-2.33
291	SF	3	-0.5
256	SF	3	-6.55
255	SF	3	-8.89
240	SF	3	-0.57
243	SF	3	-5.32
247	SF	3	-1.93
403	SF	3	-2.12
409	SF	3	-7.56
418	SF	3	-2.33
416	SF	3	-3.5
400	SF	3	-3.7
428	SF	3	-1.97
426	SF	3	-2.31
427	SF	3	-5.94
257	CON	3	0.01
258	CON	3	0.01
259	CON	3	0.02
260	CON	3	0.01
261	CON	3	-0.01
284	CON	3	-0.79
282	CON	3	2.45
300	CON	3	0
301	CON	3	1.24
293	CON	3	1.38
252	CON	3	1.68
251	CON	3	1.28
245	CON	3	2.14
241	CON	3	0.92
242	CON	3	4.35
414	CON	3	-1.18
419	CON	3	0.55
415	CON	3	0.8
408	CON	3	2.39
412	CON	3	-0.4
252	CON	3	4.8
251	CON	3	1.86
245	CON	3	0
241	CON	3	0.93
242	CON	3	2.13
407(429)	CON	3	-0.92
406	CON	3	-3.96
410	CON	3	0.87
411	CON	3	0.76
413	CON	3	1.2
256	SF	4	0.01
255	SF	4	0.02
240	SF	4	0
243	SF	4	0.02
247	SF	4	-0.06
254	SF	4	0.05
253	SF	4	0.01
244	SF	4	0.01
250	SF	4	-0.04
239	SF	4	-0.04
297	SF	4	1.52
299	SF	4	-1.42
292	SF	4	-6.95
283	SF	4	1.25
286	SF	4	-0.92
295	SF	4	-4.76
291	SF	4	-1
256	SF	4	-2.8
255	SF	4	-3.9
240	SF	4	-2.86
243	SF	4	-1.69
247	SF	4	-6.4
403	SF	4	-5.63
409	SF	4	-4.55
418	SF	4	-2.38
416	SF	4	2.07
400	SF	4	-0.96
428	SF	4	-1.01
426	SF	4	-1.42
427	SF	4	-3.4
257	CON	4	0.01
258	CON	4	0.01
259	CON	4	0.01
260	CON	4	0
261	CON	4	0.02
284	CON	4	1.19
282	CON	4	2.39
300	CON	4	-0.47
301	CON	4	0.41
293	CON	4	0.45
252	CON	4	1.24
251	CON	4	-3.78
245	CON	4	3.35
241	CON	4	4.11
242	CON	4	-0.42
414	CON	4	5.18
419	CON	4	1.09
415	CON	4	0.4
408	CON	4	5.61
412	CON	4	3.23
252	CON	4	3.75
251	CON	4	4.11
245	CON	4	4.31
241	CON	4	1.83
242	CON	4	-1.04
407(429)	CON	4	0.46
406	CON	4	0.92
410	CON	4	-0.86
411	CON	4	0.38
413	CON	4	-0.4
