# Supplementary material for: Alpha- and beta- adrenergic receptors regulate inflammatory responses to acute and chronic sleep fragmentation in mice
Source: PeerJ. 2021 Jun 24;9:e11616. doi: 10.7717/peerj.11616 (PMC8236227; doi:10.7717/peerj.11616)
Supplement: Supplemental Information 8 — Each data point indicates the corticosterone concentration. [file peerj-09-11616-s008.xlsx]

## Sheet: ASF_Cort
Sample ID	Treatment	Corticosterone Concentration
81	CONPhe	22.7616
82	CONPhe	28.0287
79	CONPhe	30.4624
83	CONPhe	40.0952
80	CONPhe	42.1491
75	CONPhe	82.7346
71	CONPro	18.331
65	CONPro	19.9226
73	CONPro	23.7292
69	CONPro	28.2631
70	CONPro	31.494
66	CONPro	49.3734
67	CONPro	97.7254
57	CONVeh	15.7797
54	CONVeh	17.5835
59	CONVeh	26.8858
63	CONVeh	34.2285
62	CONVeh	38.4603
58	CONVeh	42.8569
53	SFPhe	11.0233
27	SFPhe	16.179
51	SFPhe	20.8951
26	SFPhe	27.8628
50	SFPhe	34.1172
29	SFPhe	34.8523
52	SFPhe	49.232
23	SFPro	20.2376
48	SFPro	33.0436
3	SFPro	69.6139
25	SFPro	80.1338
22	SFPro	103.909
24	SFPro	143.78
47	SFPro	163.725
49	SFPro	226.548
42	SFVeh	29.0764
43	SFVeh	32.3466
3	SFVeh	69.6139
44	SFVeh	216.948
2	SFVeh	36.5861
1	SFVeh	155.778

## Sheet: CSF_Cort
Sample ID	Treatment	Corticosterone Concentration
1	CONPhe	0.93163
2	CONPhe	8.12328
3	CONPhe	15.4684
4	CONPhe	7.39935
5	CONPhe	5.80489
6	CONPhe	5.80489
7	CONPhe	4.03362
8	CONPhe	41.6056
9	CONPhe	23.6535
10	CONPhe	137.417
11	CONPro	0.587991
12	CONPro	59.3194
13	CONPro	0.735491
13	CONPro	23.3246
14	CONPro	6.60885
15	CONPro	7.27421
16	CONPro	9.60949
18	CONPro	14.9015
19	CONPro	21.2459
20	CONPro	22.261
21	CONVeh	2.09029
22	CONVeh	3.37681
23	CONVeh	3.37681
24	CONVeh	3.63839
25	CONVeh	15.6699
26	CONVeh	14.0899
27	CONVeh	4.34635
28	CONVeh	4.5117
29	CONVeh	32.0364
30	CONVeh	24.6682
31	CSFPhe	24.0005
33	CSFPhe	146.696
34	CSFPhe	165.622
35	CSFPhe	254.445
36	CSFPhe	105.812
37	CSFPhe	86.1688
38	CSFPhe	116.164
39	CSFPhe	140.007
40	CSFPhe	158.07
41	CSFPro	6.97061
42	CSFPro	21.119
43	CSFPro	39.6075
44	CSFPro	33.7555
45	CSFPro	85.3212
46	CSFPro	0.261563
47	CSFPro	0.237638
48	CSFPro	0.511912
49	CSFPro	2.50552
50	CSFPro	3.23587
51	CSFVeh	71.1813
52	CSFVeh	117.469
53	CSFVeh	52.2551
54	CSFVeh	52.2551
55	CSFVeh	71.9441
56	CSFVeh	36.1696
57	CSFVeh	80.7185
58	CSFVeh	53.0336
59	CSFVeh	38.974
60	CSFVeh	60.4372
